# Supplementary material for: Effect of pioglitazone on inflammatory response and clinical outcome in T2DM patients with COVID-19: a randomized multicenter double-blind clinical trial
Source: Front Immunol. 2024 Sep 6;15:1369918. doi: 10.3389/fimmu.2024.1369918 (PMC11412854; doi:10.3389/fimmu.2024.1369918)
Supplement: Supplementary file 2 [file Table1.xlsx]

## Sheet: CLINICALTRIALDATA
Participant ID	Date of Randomization	MedCode	CENTER	Randomization	Hosp_stay_Days	Age	Gender	Weight	Height	BMI	Diabetes duration	FBG	RBG	RESP_RATE	O2 Saturation	Heart rate	INSULIN_YN	STEROID_YN	Remdesivir_YN	Hypertension_YN	PULM_DIS_YN	CVD_YN	Type of Diabetes	COVID-19 Diagnosis date	Status_Date	Patients current status	Symptoms_Group	Fever	Chills	Headache	Rhinorreah	Cough	Sputum	SoreThroat	SOB	Hemoptysis	Alt_mentation	Fatigue	Myalgia	Nau_Vomit	Diarrhea	Anosmia	Chest_pain	Skinsymptoms	Smoking	Alcohol	Drug/Food Allergies	Type 2 Diabetes	Hypertension
1001	2021-04-07	7001	KUWAIT	Placebo	6	56	Female	85	158	34	0	8.7	7.7	24	97	90	No	No	No	No	No	No	Known T2DM	2021-04-02	2021-04-13	Discharged	Symptoms+	Mild	No	Mild	No	Mild	No	Mild	No	No	No	Moderate	Moderate	No	Moderate	No	No	No	Never Smoked	No	Yes	Yes	No
1002	2021-07-06	7002	KUWAIT	Pioglitazone	22	62	Female	72	146	34	13		25	22	94	90	No	No	No	Yes	No	No	Known T2DM	2021-06-28	2021-07-28	Died	Symptoms+	No	No	No	No	Mild	No	No	Mild	No	No	Mild	No	No	No	No	Mild	No	Never Smoked	No	No	Yes	Yes
1003	2021-07-12	7003	KUWAIT	Placebo	1	62	Female	66	164	25	62		20	22	96	68	Yes	Yes	No	No	No	No	Known T2DM	2021-06-29	2021-07-13	EVENT	Symptoms+	No	No	No	No	Moderate	No	No	Moderate	No	No	No	No	Mild	No	Moderate	No	No	Never Smoked	No	No	Yes	No
1004	2021-04-15	7004	KUWAIT	Placebo	6	61	Female	63	155	26	6	7.9	6.4	22	94	82	No	No	No	No	No	No	Known T2DM	2021-04-12	2021-04-21	Discharged	Symptoms+	Moderate	No	No	No	Moderate	No	No	Moderate	No	No	No	No	No	No	No	No	Moderate	Never Smoked	No	No	Yes	No
1005	2021-04-11	7005	QATAR	Pioglitazone	5	66	Male	65	158	26	5	9	9.3	24	95	95	No	No	No	No	No	No	Known T2DM	2021-04-10	2021-04-16	Discharged	Symptoms+	Moderate	Moderate	No	No	Moderate	No	No	Mild	No	No	Moderate	Moderate	No	No	No	No	No	Never Smoked	No	No	Yes	No
1006	2021-03-15	7006	QATAR	Placebo	40	51	Male	77.72	166	28	0	5	6.8	23	96	88	No	Yes	No	Yes	No	No	New Onset Diabetes	2021-04-22	2021-04-24	Discharged	Symptoms+	No	No	No	No	Moderate	No	Moderate	Moderate	No	No	No	No	No	No	No	No	No	Never Smoked	No	No	No	No
1007	2021-03-21	7007	QATAR	Pioglitazone	11	54	Male	88	175	29	0	14	18	24	94	91	Yes	Yes	Yes	No	No	No	Known T2DM	2021-03-19	2021-04-01	Discharged	Symptoms+	No	No	No	No	Moderate	No	No	Moderate	No	No	No	No	No	No	No	No	No	Currently smoker	No	No	Yes	No
1008	2021-03-29	7008	KUWAIT	Pioglitazone	3	56	Male	105	155	44	8	14.8	14	22	95	88	Yes	Yes	No	No	No	No	Known T2DM	2021-03-20	2021-04-01	Discharged	Symptoms+	Moderate	No	No	No	Moderate	No	No	Moderate	No	No	No	No	No	No	No	No	No	Never Smoked	No	No	Yes	No
1009	2021-02-03	7009	KUWAIT	Placebo	8	72	Male	82	170	28	12	10	12	20	97	70	No	No	No	Yes	No	Yes	Known T2DM	2021-02-02	2021-02-11	Discharged	Symptoms+	No	No	No	No	No	No	No	Moderate	No	No	No	No	No	No	No	Moderate	No	Never Smoked	No	No	Yes	Yes
1010	2021-01-20	7010	KUWAIT	Pioglitazone	9	76	Male	74	172	25	28	5.9	12.5	20	98	66	No	No	No	Yes	No	No	Known T2DM	2021-01-18	2021-01-29	Discharged	Symptoms+	Mild	No	No	No	Mild	No	No	No	No	No	No	No	No	No	No	No	No	Never Smoked	No	No	Yes	Yes
1011	2021-02-02	7011	KUWAIT	Pioglitazone	1	65	Female	78	154	33	11		9	22	97	77	Yes	No	No	Yes	Yes	Yes	Known T2DM	2021-01-21	2021-02-03	Discharged	Symptoms+	No	No	No	No	Moderate	No	No	Moderate	No	No	No	No	No	No	No	No	No	Never Smoked	No	No	Yes	Yes
1012	2021-03-25	7012	QATAR	Placebo	1	34	Male	87	170	30	0	5.9	7.2	26	94	83	Yes	Yes	No	Yes	No	No	Known T2DM	2021-03-24	2021-03-26	Discharged	Symptoms+	Moderate	Mild	Mild	No	Moderate	No	No	Mild	No	No	Moderate	No	No	No	No	No	No	Never Smoked	No	No	Yes	Yes
1013	2021-07-26	7013	KUWAIT	Placebo	2	62	Male	70	178	22	15		15	22	94	88	No	Yes	No	No	No	No	Known T2DM	2021-07-14	2021-07-28	Discharged	Symptoms+	No	No	No	No	Moderate	Moderate	No	Moderate	No	No	No	No	No	No	No	Moderate	No	Never Smoked	No	No	Yes	No
1014	2021-04-22	7014	KUWAIT	Pioglitazone	5	45	Female	85	165	31	12		13.5	22	96	68	No	No	No	No	No	No	Known T2DM	2021-04-13	2021-04-27	Discharged	Symptoms+	Moderate	No	Moderate	No	Moderate	No	No	No	No	No	No	No	Moderate	Moderate	No	No	No	Never Smoked	No	Yes	Yes	No
1015	2021-01-26	7015	KUWAIT	Placebo	13	52	Female	72	158	29	20		19.6	24	97	72	Yes	No	No	No	No	No	Known T2DM	2021-01-23	2021-02-08	Discharged	Symptoms+	Mild	No	No	No	Mild	No	No	Mild	No	No	No	No	No	No	No	No	No	Never Smoked	No	No	Yes	No
1016	2021-01-27	7016	KUWAIT	Placebo	14	62	Female	70	160	27	20	7	11	20	94	90	Yes	No	No	Yes	No	No	Known T2DM	2021-01-26	2021-02-10	Discharged	Asymptomatic	No	No	No	No	No	No	No	No	No	No	No	No	No	No	No	No	No	Never Smoked	No	No	Yes	No
1017	2021-01-18	7017	KUWAIT	Pioglitazone	10	40	Male	74	164	28	0	11	17	20	99	70	No	No	No	No	No	No	Known T2DM	2021-01-15	2021-01-28	Discharged	Symptoms+	Moderate	No	No	No	Moderate	No	No	Moderate	No	No	No	No	No	No	No	No	No	Never Smoked	No	No	Yes	No
1018	2021-04-26	7018	KUWAIT	Pioglitazone	13	37	Male	98	175	32	0		14.2	22	95	76	No	No	No	No	No	No	New Onset Diabetes	2021-04-20	2021-05-09	Discharged	Symptoms+	Moderate	No	No	No	Moderate	No	No	No	No	No	No	No	Moderate	No	No	No	No	Never Smoked	No	No	No	No
1022	2021-01-29	7022	KUWAIT	Pioglitazone	13	52	Female	75.4	165	28	2		13	22	98	86	No	No	No	No	No	No	Known T2DM	2021-01-26	2021-02-11	Discharged	Symptoms+	No	No	No	No	Mild	No	No	No	No	No	No	No	No	No	No	No	No	Never Smoked	No	No	Yes	No
1024	2021-03-30	7024	QATAR	Placebo	2	72	Male	81	168	29	7	8.3	6.8	22	97	95	No	No	No	Yes	No	No	Known T2DM	2021-03-27	2021-04-01	Discharged	Symptoms+	Moderate	No	No	No	Moderate	No	No	Mild	No	No	No	No	No	No	No	No	No	Currently smoker	No	No	Yes	No
1025	2021-02-15	7025	KUWAIT	Pioglitazone	6	56	Female	73	156	30	5		8.1	24	98	102	No	No	No	No	No	No	Known T2DM	2021-02-06	2021-02-21	Discharged	Symptoms+	Moderate	No	No	No	No	No	No	No	No	No	Moderate	No	Moderate	No	No	No	No	Never Smoked	No	No	Yes	No
1026	2021-04-21	7026	KUWAIT	Placebo	13	46	Female	129	161	50	10	7.2	11.2	22	95	103	Yes	Yes	No	Yes	No	No	Known T2DM	2021-04-11	2021-05-04	Discharged	Symptoms+	Moderate	No	No	No	Moderate	No	No	Moderate	No	No	No	No	No	No	No	No	No	Never Smoked	No	No	Yes	Yes
1027	2021-07-13	7027	KUWAIT	Placebo	12	62	Male	86	170	30	8		7.2	22	94	71	No	Yes	No	Yes	No	No	Known T2DM	2021-07-08	2021-07-25	Discharged	Symptoms+	Moderate	No	No	No	No	No	No	Moderate	No	No	No	No	No	No	No	No	No	Never Smoked	No	No	Yes	Yes
1028	2021-01-25	7028	KUWAIT	Placebo	8	41	Female	113	170	39	1		12.9	22	95	78	No	Yes	No	Yes	No	No	New Onset Diabetes	2021-01-22	2021-02-02	Discharged	Symptoms+	No	No	No	No	Moderate	No	Mild	Mild	No	No	No	No	No	No	No	No	No	Never Smoked	No	No	No	Yes
1031	2021-01-29	7031	KUWAIT	Pioglitazone	8	48	Female	65	155	27	20		12	22	96	102	Yes	No	No	Yes	No	No	Known T2DM	2021-01-20	2021-02-06	Discharged	Symptoms+	Moderate	No	No	No	Moderate	No	No	No	No	No	No	Moderate	Moderate	Moderate	No	No	No	Never Smoked	No	No	Yes	Yes
1032	2021-01-26	7032	KUWAIT	Placebo	6	64	Female	67	156	28	50		14	24	99	72	Yes	No	No	No	No	No	Known T2DM	2021-01-20	2021-02-01	Discharged	Symptoms+	No	No	Mild	No	Mild	No	No	No	No	No	No	Mild	Mild	Mild	No	No	No	Never Smoked	No	No	Yes	Yes
1033	2021-01-27	7033	KUWAIT	Placebo	5	63	Male	83	170	29	10	19.7		20	95	76	Yes	Yes	No	No	No	No	Known T2DM	2021-02-25	2021-02-01	Discharged	Symptoms+	No	No	No	No	No	No	No	No	No	No	Moderate	Moderate	No	No	No	No	No	Never Smoked	No	No	Yes	No
1036	2021-02-08	7036	KUWAIT	Pioglitazone	6	72	Male	82	154	35	10		15	22	100	60	No	No	No	Yes	Yes	No	Known T2DM	2021-02-04	2021-02-14	Discharged	Symptoms+	Moderate	No	No	No	Moderate	No	No	Moderate	No	No	No	No	No	No	No	No	No	Never Smoked	No	No	Yes	Yes
1038	2021-05-02	7038	KUWAIT	Placebo	35	53	Female	93	163	35	10		19	22	94	81	Yes	No	No	No	Yes	No	Known T2DM	2021-04-29	2021-06-06	Died	Symptoms+	Moderate	No	No	No	Moderate	No	No	No	No	No	No	No	No	Moderate	No	No	No	Never Smoked	No	No	Yes	Yes
1039	2021-02-10	7039	KUWAIT	Pioglitazone	4	56	Male	122	181	37	12		8.2	22	94	90	No	No	No	Yes	No	No	Known T2DM	2021-02-05	2021-02-14	Discharged	Symptoms+	Mild	No	No	No	Mild	No	No	Mild	No	No	No	No	No	No	No	No	No	Never Smoked	No	No	Yes	Yes
1040	2021-03-21	7040	QATAR	Placebo	14	40	Male	70	162	27	12	10	14	24	95	80	No	No	No	No	No	No	Known T2DM	2021-03-17	2021-04-04	Discharged	Symptoms+	Moderate	No	No	No	Moderate	No	No	Mild	No	No	No	No	No	No	No	Mild	No	Past Smoker	Yes	No	Yes	No
1041	2021-02-01	7041	KUWAIT	Placebo	1	54	Male	112	165	41	10		11.2	22	95	84	No	No	No	Yes	No	Yes	Known T2DM	2021-01-21	2021-02-02	Discharged	Symptoms+	No	No	No	No	Moderate	No	No	Moderate	No	No	No	No	No	No	No	No	No	Never Smoked	No	No	Yes	Yes
1044	2021-02-09	7044	KUWAIT	Pioglitazone	13	65	Male	89	169	31	1		18.9	24	96	90	No	No	No	Yes	No	No	New Onset Diabetes	2021-01-30	2021-02-22	Discharged	Symptoms+	Moderate	No	No	No	Moderate	No	No	No	No	No	No	No	No	No	No	No	No	Never Smoked	No	No	No	Yes
1045	2021-02-22	7045	KUWAIT	Pioglitazone	5	55	Female	75	165	28	15		12.7	22	99	64	Yes	Yes	No	Yes	No	No	Known T2DM	2021-02-21	2021-02-27	Discharged	Symptoms+	No	No	Moderate	No	No	No	No	No	No	No	No	Moderate	No	No	No	No	No	Never Smoked	No	No	Yes	Yes
1046	2021-03-15	7046	QATAR	Pioglitazone	5	28	Female	68	160	27	3	10.7	15.9	19	98	82	No	No	No	No	No	No	Known T2DM	2021-03-15	2021-03-20	Discharged	Symptoms+	Moderate	No	No	No	Moderate	No	No	Moderate	No	No	No	No	Moderate	Moderate	No	No	No	Never Smoked	No	No	Yes	No
1047	2021-03-15	7047	QATAR	Pioglitazone	1	74	Male	60	163	23	12	9.8	13.2	23	96	79	No	Yes	Yes	Yes	No	Yes	Known T2DM	2021-03-11	2021-03-16	Discharged	Symptoms+	Mild	Mild	No	No	Mild	Mild	Mild	Mild	No	No	Mild	Mild	No	No	No	Mild	No	Past Smoker	No	No	Yes	Yes
1048	2021-03-22	7048	QATAR	Pioglitazone	4	58	Male	82	167	29	5	10.3	12.5	25	94	112	No	Yes	No	Yes	No	No	Known T2DM	2021-03-20	2021-03-26	EVENT	Symptoms+	Mild	No	No	No	Mild	No	No	Moderate	No	No	Moderate	Moderate	No	No	No	No	No	Never Smoked	No	No	Yes	Yes
1050	2021-07-26	7050	KUWAIT	Pioglitazone	23	73	Female	88	165	32	31		14.2	24	95	78	Yes	No	No	Yes	No	No	Known T2DM	2021-07-22	2021-08-18	Discharged	Symptoms+	Moderate	No	No	No	Moderate	Moderate	No	No	No	No	Moderate	Moderate	No	Moderate	No	No	No	Never Smoked	No	No	Yes	Yes
1051	2021-08-03	7051	KUWAIT	Pioglitazone	11	44	Female	125	167	45	15		25	24	94	98	Yes	Yes	No	Yes	No	No	Known T2DM	2021-08-02	2021-08-14	Discharged	Asymptomatic	No	No	No	No	No	No	No	No	No	No	No	No	No	No	No	No	No	Never Smoked	No	No	Yes	Yes
1052	2021-04-07	7052	KUWAIT	Pioglitazone	9	47	Male	112	165	41	5		18.6	22	94	91	Yes	No	No	No	No	No	Known T2DM	2021-04-02	2021-04-16	Discharged	Symptoms+	Moderate	No	No	No	Moderate	No	No	Moderate	No	No	Moderate	No	No	No	No	No	No	Never Smoked	No	No	Yes	No
1053	2021-03-15	7053	QATAR	Pioglitazone	8	59	Male	80	168	28	13	6	8	21	96	93	Yes	No	No	No	No	No	Known T2DM	2021-03-14	2021-03-23	Discharged	Symptoms+	Moderate	Mild	Mild	No	Moderate	No	No	Mild	No	No	Mild	Mild	No	No	No	No	No	Never Smoked	No	No	Yes	No
1054	2021-03-27	7054	QATAR	Pioglitazone	3	48	Male	70	170	24	10	11	10.5	24	95	98	No	Yes	No	No	No	No	Known T2DM	2021-03-20	2021-03-30	Discharged	Symptoms+	Moderate	Mild	No	Mild	Moderate	No	Moderate	Mild	No	No	Moderate	No	No	No	No	No	No	Never Smoked	No	Yes	Yes	No
1055	2021-02-01	7055	KUWAIT	Placebo	1	59	Male	98	183	29	1		7.8	22	95	90	No	No	No	No	No	No	Known T2DM	2021-01-25	2021-02-02	Discharged	Symptoms+	Moderate	No	No	No	Moderate	No	No	No	No	No	No	Moderate	No	No	No	No	No	Never Smoked	No	No	Yes	No
1057	2021-02-08	7057	KUWAIT	Placebo	10	68	Male	85	157	34	15		10	22	96	66	No	No	No	Yes	No	No	Known T2DM	2021-02-06	2021-02-18	Discharged	Symptoms+	Moderate	No	No	No	Moderate	No	No	Moderate	No	No	No	No	Moderate	Moderate	No	No	No	Never Smoked	No	No	Yes	Yes
1058	2021-03-27	7058	QATAR	Placebo	84	62	Male	90	165	33	14	12	12.6	28	98	72	Yes	Yes	No	Yes	No	No	Known T2DM	2021-03-23	2021-06-19	Died	Symptoms+	Mild	No	No	Mild	Moderate	Mild	Mild	Moderate	No	No	Moderate	Moderate	No	Moderate	No	No	No	Never Smoked	No	No	Yes	Yes
1059	2021-07-12	7059	KUWAIT	Pioglitazone	21	62	Female	70	155	29	15		14	26	96	100	No	Yes	No	No	No	No	Known T2DM	2021-07-07	2021-08-02	Died	Symptoms+	Mild	No	No	No	Moderate	No	No	Moderate	No	No	No	No	Mild	Moderate	No	No	No	Never Smoked	No	No	Yes	Yes
1060	2021-01-27	7060	KUWAIT	Pioglitazone	14	64	Male	110	176	36	15		9.5	24	96	99	Yes	Yes	Yes	Yes	No	No	Known T2DM	2021-01-19	2021-02-10	Discharged	Symptoms+	No	No	No	No	Mild	No	No	Mild	No	No	Mild	Mild	No	No	No	No	No	Past Smoker	No	No	Yes	Yes
1061	2021-07-28	7061	KUWAIT	Pioglitazone	10	84	Male	85	166	31	5		16.7	22	96	72	No	Yes	No	Yes	No	Yes	Known T2DM	2021-07-24	2021-08-07	Died	Symptoms+	Moderate	No	Moderate	No	Moderate	No	No	Moderate	No	No	No	No	No	No	No	Moderate	No	Never Smoked	No	No	Yes	No
1062	2021-03-29	7062	QATAR	Pioglitazone	3	46	Male	65	162	25	0	8	10	21	95	86	Yes	Yes	No	Yes	No	No	Known T2DM	2021-03-26	2021-04-01	Discharged	Symptoms+	Moderate	No	No	No	Moderate	Mild	No	Moderate	No	No	No	No	No	No	No	No	No	Never Smoked	No	No	Yes	Yes
1063	2021-04-24	7063	QATAR	Placebo	10	39	Male	98	175	32	0	10	8.1	23	98	60	No	Yes	No	No	No	No	Known T2DM		2021-05-04	Discharged	Asymptomatic	No	No	No	No	No	No	No	No	No	No	No	No	No	No	No	No	No	Never Smoked	No	No	Yes	No
1064	2021-04-16	7064	QATAR	Pioglitazone	1	60	Female	113	164	42	9	18	20	19	99	95	Yes	No	No	Yes	No	No	Known T2DM	2021-04-12	2021-04-17	Discharged	Symptoms+	Moderate	No	No	No	Moderate	No	No	No	No	No	Moderate	No	No	No	No	No	No	Never Smoked	No	No	Yes	Yes
1065	2021-03-18	7065	QATAR	Placebo	5	53	Male	79	179	25	7		17.1	21	95	81	Yes	Yes	Yes	Yes	No	No	Known T2DM	2021-03-16	2021-03-23	Discharged	Symptoms+	Mild	No	No	No	Moderate	No	No	Moderate	No	No	Mild	Mild	Mild	No	No	No	No	Never Smoked	No	No	Yes	Yes
1066	2021-02-10	7066	KUWAIT	Pioglitazone	2	59	Female	89	152	39	6		8.5	22	98	96	No	No	No	Yes	Yes	No	Known T2DM	2021-02-06	2021-02-12	EVENT	Symptoms+	Mild	No	No	No	Mild	No	No	Mild	No	No	No	Mild	No	No	No	No	No	Never Smoked	No	No	Yes	Yes
1067	2021-04-06	7067	QATAR	Placebo	2	36	Male	72	155	30	0	8.4	9.6	22	94	79	Yes	Yes	No	No	No	No	New Onset Diabetes	2021-04-04	2021-04-08	Discharged	Symptoms+	Mild	No	No	No	Moderate	Mild	No	Moderate	No	No	No	No	No	No	No	No	No	Never Smoked	No	No	No	No
1068	2021-05-04	7068	KUWAIT	Pioglitazone	3	62	Male	86	172	29	20		20	22	95	88	Yes	No	No	Yes	No	No	Known T2DM	2021-05-01	2021-05-07	Discharged	Symptoms+	No	No	No	No	Mild	No	No	No	No	No	Moderate	Moderate	No	Mild	No	No	No	Never Smoked	No	No	Yes	Yes
1071	2021-04-06	7071	QATAR	Pioglitazone	2	43	Male	83	162	32	0	15	16	22	95	72	Yes	Yes	No	No	No	No	Known T2DM	2021-04-03	2021-04-08	Discharged	Symptoms+	Moderate	No	No	No	Moderate	Mild	No	Moderate	No	No	No	No	No	No	No	No	No	Never Smoked	No	No	Yes	No
1072	2021-07-27	7072	KUWAIT	Placebo	6	58	Male	88	173	29	6		19.7	22	94	90	Yes	Yes	No	Yes	No	No	Known T2DM	2021-07-20	2021-08-02	Discharged	Symptoms+	Moderate	No	No	No	Moderate	No	No	Moderate	No	No	Moderate	No	No	No	No	No	No	Never Smoked	No	No	Yes	Yes
1073	2021-08-03	7073	KUWAIT	Pioglitazone	13	54	Female	125	161	48	8		12.6	22	98	67	No	Yes	No	No	No	No	Known T2DM	2021-07-29	2021-08-16	Discharged	Symptoms+	Moderate	No	No	No	Moderate	No	Moderate	Moderate	No	No	Moderate	No	No	No	No	No	No	Never Smoked	No	No	Yes	No
1074	2021-04-25	7074	QATAR	Placebo	8	53	Male	92	177	29	10	7.3	8.8	20	96	82	No	Yes	Yes	No	No	No	Known T2DM		2021-05-03	Discharged	Asymptomatic	No	No	No	No	No	No	No	No	No	No	No	No	No	No	No	No	No	Never Smoked	No	No	Yes	No
1075	2021-07-06	7075	KUWAIT	Placebo	2	52	Female	73	152	32	5		15	20	96	96	No	No	No	No	No	No	Known T2DM	2021-07-03	2021-07-08	Discharged	Symptoms+	Mild	No	No	No	Mild	No	No	Mild	No	No	No	No	No	No	No	No	No	Never Smoked	No	No	Yes	No
1076	2021-04-06	7076	QATAR	Placebo	2	48	Male	74	173	25	0	14	12	18	95	55	Yes	Yes	No	No	No	No	Known T2DM	2021-04-01	2021-04-08	Discharged	Symptoms+	No	No	No	No	Moderate	Mild	No	Moderate	No	No	No	No	No	No	No	No	No	Never Smoked	No	No	Yes	No
1077	2021-04-11	7077	QATAR	Placebo	8	55	Female	122	157	49	8	10	9.8	20	97	88	Yes	No	No	Yes	No	No	Known T2DM	2021-04-08	2021-04-19	Discharged	Symptoms+	Moderate	No	No	No	Moderate	No	No	No	No	No	No	No	No	No	No	No	No	Never Smoked	No	No	Yes	Yes
1079	2021-05-04	7079	KUWAIT	Placebo	3	56	Female	95	156	39	10		20	22	96	84	No	No	No	Yes	No	No	Known T2DM	2021-04-22	2021-05-07	Discharged	Symptoms+	Moderate	No	No	No	Moderate	Moderate	No	Mild	No	No	No	Moderate	No	Moderate	No	Moderate	No	Never Smoked	No	No	Yes	Yes
1080	2021-07-27	7080	KUWAIT	Placebo	6	58	Male	84	170	29	15		11.8	22	98	80	No	Yes	No	No	No	No	Known T2DM	2021-07-22	2021-08-02	Discharged	Symptoms+	Moderate	No	No	No	Moderate	No	No	Moderate	No	No	No	No	Moderate	No	No	No	No	Never Smoked	No	No	Yes	No
1081	2021-05-04	7081	KUWAIT	Pioglitazone	8	55	Female	129	157	52	14		17	22	95	91	Yes	No	No	Yes	No	No	Known T2DM	2021-04-26	2021-05-12	Discharged	Symptoms+	No	No	No	No	Moderate	No	No	Moderate	No	No	Moderate	No	No	Moderate	No	No	No	Never Smoked	No	No	Yes	Yes
1082	2021-04-26	7082	QATAR	Pioglitazone	12	53	Male	73	164	27	2	8.9	6.3	22	98	89	Yes	Yes	Yes	Yes	No	No	Known T2DM	2021-04-25	2021-05-08	Discharged	Symptoms+	Mild	Mild	Mild	No	Mild	No	No	Mild	No	No	No	Mild	No	No	No	No	No	Never Smoked	No	No	Yes	Yes
1084	2021-04-01	7084	QATAR	Pioglitazone	5	54	Male	61	162	23	10	9	11	24	94	90	Yes	Yes	No	No	No	No	Known T2DM	2021-03-27	2021-04-06	Discharged	Symptoms+	Moderate	No	No	No	Mild	Moderate	No	Moderate	No	No	No	No	No	No	No	No	No	Past Smoker	Yes	No	Yes	No
1085	2021-03-21	7085	QATAR	Pioglitazone	12	59	Male	68	160	27	10	13.7	14	28	96	80	Yes	Yes	Yes	No	No	No	Known T2DM	2021-03-17	2021-04-02	Discharged	Symptoms+	No	No	Mild	No	Moderate	Moderate	No	Moderate	No	No	No	No	No	No	No	No	No	Never Smoked	No	No	Yes	No
1086	2021-03-18	7086	QATAR	Placebo	1	40	Male	61	155	25	1		20	21	95	84	Yes	Yes	Yes	No	No	No	Known T2DM	2021-03-07	2021-03-19	Discharged	Symptoms+	Mild	No	Mild	Mild	Severe	Moderate	No	Severe	No	No	Severe	Severe	No	No	No	No	No	Never Smoked	No	No	Yes	No
1088	2021-04-29	7088	QATAR	Pioglitazone	9	59	Female	78	159	31	10	30.5	16.1		96	99	Yes	Yes	Yes	Yes	No	No	Known T2DM	2021-04-28	2021-05-08	Discharged	Symptoms+	Mild	No	No	No	Mild	No	No	No	No	No	No	No	No	No	No	No	No	Never Smoked	No	No	Yes	Yes
1090	2021-02-15	7090	KUWAIT	Placebo	12	61	Female	68	155	28	5		9.9	22	97	90	No	No	No	No	No	No	Known T2DM	2021-02-10	2021-02-27	Discharged	Symptoms+	Moderate	No	Moderate	No	Moderate	No	No	Moderate	No	No	Moderate	No	Moderate	No	No	No	No	Never Smoked	No	No	Yes	No
1091	2021-05-02	7091	QATAR	Placebo	10	51	Male	88.9	173	30	4	10.2	17	20	97	78	Yes	No	No	No	No	No	New Onset Diabetes	2021-05-09	2021-05-12	Discharged	Symptoms+	Mild	No	Mild	No	Mild	No	No	No	No	No	No	Moderate	No	No	No	No	No	Never Smoked	No	No	No	No
1092	2021-03-31	7092	QATAR	Placebo	1	79	Female	55	152	24	16	9	12	19	94	71	Yes	Yes	No	Yes	No	Yes	Known T2DM	2021-03-28	2021-04-01	Discharged	Symptoms+	Mild	No	Mild	No	Mild	No	No	Mild	No	No	Mild	Mild	No	No	No	No	No	Never Smoked	No	No	Yes	Yes
1094	2021-01-26	7094	KUWAIT	Pioglitazone	6	63	Male	97	170	34	13		17	24	97	88	No	No	No	Yes	No	No	Known T2DM	2021-01-18	2021-02-01	Discharged	Symptoms+	Mild	No	No	No	Mild	No	No	Mild	No	No	Mild	No	No	No	No	No	No	Never Smoked	No	No	Yes	Yes
1096	2021-04-14	7096	QATAR	Pioglitazone	9	46	Male	73	161	28	0	14.4	15.4	22	96	68	Yes	Yes	No	No	No	No	Known T2DM	2021-04-10	2021-04-23	Discharged	Symptoms+	Mild	No	No	No	Mild	No	No	Mild	No	No	No	No	No	Mild	No	No	No	Never Smoked	No	No	Yes	No
1097	2021-02-09	7097	KUWAIT	Placebo	13	72	Male	85	179	27	10		12.7	22	100	74	No	No	No	No	No	No	Known T2DM	2021-02-08	2021-02-22	Discharged	Symptoms+	Moderate	No	No	No	Moderate	No	No	No	No	No	No	No	No	No	No	No	No	Never Smoked	No	No	Yes	No
1098	2021-07-13	7098	KUWAIT	Placebo	4	50	Female	101	156	42	1		7.8	26	94	100	No	Yes	No	No	No	No	Known T2DM	2021-07-01	2021-07-17	EVENT	Symptoms+	Mild	No	Mild	No	Moderate	No	No	Moderate	No	No	No	Moderate	Moderate	No	No	Moderate	No	Never Smoked	No	No	Yes	No
1099	2021-03-29	7099	QATAR	Pioglitazone	25	53	Male	62	160	24	0	8.7	11.8	24	98	82	Yes	Yes	No	No	No	No	Known T2DM	2021-03-24	2021-04-23	Discharged	Symptoms+	Moderate	No	No	No	Mild	Mild	No	Moderate	No	No	Mild	Mild	Mild	Mild	No	No	No	Never Smoked	No	No	Yes	No
1100	2021-01-27	7100	KUWAIT	Pioglitazone	14	45	Female	69.3	149.8	31	10		14.2	22	95	72	Yes	No	No	No	No	No	Known T2DM	2021-01-25	2021-02-10	Discharged	Symptoms+	No	No	No	No	Moderate	No	No	No	No	No	No	No	No	No	No	No	No	Never Smoked	No	No	Yes	No
1101	2021-08-04	7101	KUWAIT	Pioglitazone	6	55	Female	75	160	29	10		16.4	22	94	86	No	Yes	No	Yes	No	No	Known T2DM	2021-08-01	2021-08-10	Discharged	Symptoms+	Moderate	No	No	No	No	No	No	Moderate	No	No	No	No	No	Moderate	No	No	No	Never Smoked	No	Yes	Yes	Yes
1102	2021-04-20	7102	QATAR	Pioglitazone	9	54	Male	73.5	178	23	3	9.5	12	25	92	72	Yes	Yes	No	No	No	No	Known T2DM	2021-04-19	2021-04-29	Discharged	Symptoms+	Mild	No	No	Mild	Moderate	No	No	Mild	No	No	No	No	No	No	No	No	No	Never Smoked	No	No	Yes	No
1103	2021-02-19	7103	KUWAIT	Placebo	1	46	Male	64	169	22	8	9.8		24	96	100	Yes	No	No	No	No	No	Known T2DM	2021-02-16	2021-02-20	Discharged	Symptoms+	Moderate	No	No	No	Moderate	No	No	No	No	No	No	Moderate	No	No	No	No	No	Never Smoked	No	No	Yes	No
1104	2021-04-19	7104	QATAR	Placebo	6	39	Male	86.7	164	32	0	14.8	18	27	95	82	Yes	Yes	No	No	No	No	New Onset Diabetes	2021-04-15	2021-04-25	Discharged	Symptoms+	Mild	No	No	No	Mild	No	No	Mild	No	No	Mild	No	No	No	No	No	No	Never Smoked	No	No	No	No
1105	2021-04-21	7105	KUWAIT	Pioglitazone	8	55	Female	80	160	31	15	15	13	20	100	85	Yes	Yes	No	Yes	No	No	Known T2DM	2021-04-09	2021-04-29	Discharged	Asymptomatic	No	No	No	No	No	No	No	No	No	No	No	No	No	No	No	No	No	Past Smoker	No	No	Yes	Yes
1106	2021-03-29	7106	QATAR	Placebo	6	46	Male	62	168	22	6	12	11.5	23	96	91	Yes	Yes	No	No	No	No	Known T2DM	2021-03-26	2021-04-04	Discharged	Symptoms+	Moderate	No	No	No	Moderate	Mild	No	Moderate	No	No	No	No	No	No	No	No	No	Never Smoked	No	No	Yes	No
1107	2021-02-01	7107	KUWAIT	Pioglitazone	1	53	Male	70	170	24	10	10	15	20	92	88	No	No	No	No	No	No	Known T2DM	2021-01-29	2021-02-02	Discharged	Symptoms+	No	No	Moderate	No	Moderate	No	Moderate	Severe	No	No	Moderate	Moderate	No	No	No	No	No	Never Smoked	No	No	Yes	No
1108	2021-02-15	7108	KUWAIT	Pioglitazone	3	69	Female	82	156	34	15		10.9	22	95	92	Yes	No	No	No	No	No	Known T2DM	2021-02-13	2021-02-18	Discharged	Symptoms+	No	No	No	No	Moderate	No	No	No	No	No	No	Moderate	No	No	No	No	No	Currently smoker	No	No	Yes	Yes
1109	2021-04-25	7109	QATAR	Pioglitazone	9	56	Male	84	160	33	5	15.6	10.2	20	97	89	Yes	Yes	Yes	No	No	No	New Onset Diabetes	2021-04-26	2021-05-04	Discharged	Symptoms+	No	No	No	No	Mild	No	No	No	No	No	No	No	No	Moderate	No	No	No	Never Smoked	No	No	No	No
1110	2021-02-22	7110	KUWAIT	Pioglitazone	2	54	Female	90	158	36	1		7.8	22	95	98	No	No	No	Yes	No	No	Known T2DM	2021-02-14	2021-02-24	Discharged	Symptoms+	Moderate	No	Moderate	No	Moderate	No	No	Moderate	No	No	No	Moderate	Moderate	Mild	No	No	No	Never Smoked	No	No	Yes	Yes
1113	2021-04-19	7113	QATAR	Placebo	4	48	Male	90	182	27	0	20.7	27.7	22	95	86	Yes	Yes	No	No	No	No	New Onset Diabetes	2021-04-15	2021-04-23	Discharged	Symptoms+	Mild	No	No	No	Mild	No	No	Moderate	No	No	Mild	No	No	No	No	No	No	Never Smoked	No	No	No	No
1115	2021-04-08	7115	QATAR	Pioglitazone	14	43	Male	65	162	25	0	10	13	21	96	78	Yes	Yes	No	No	No	No	Known T2DM	2021-04-07	2021-04-22	Discharged	Symptoms+	Moderate	No	No	No	Moderate	Mild	No	Severe	No	No	No	No	No	No	No	No	No	Never Smoked	No	No	Yes	No
1116	2021-02-01	7116	KUWAIT	Placebo	38	55	Male	82	174	27	20	7.3		30	95	96	No	No	No	No	No	No	Known T2DM	2021-01-25	2021-03-11	Died	Symptoms+	Mild	No	No	No	Mild	No	No	Mild	No	No	No	No	No	No	No	No	No	Past Smoker	No	No	Yes	No
1117	2021-07-27	7117	KUWAIT	Pioglitazone	6	56	Female	77	155	32	1		25	22	91	86	No	Yes	No	No	No	No	New Onset Diabetes	2021-07-23	2021-08-02	Discharged	Symptoms+	No	No	No	No	Moderate	No	No	Moderate	No	No	No	No	No	No	No	No	No	Never Smoked	No	No	No	No
1118	2021-04-19	7118	QATAR	Pioglitazone	3	49	Male	90	172	30	0	8.7	9.4	25	95	86	Yes	Yes	No	No	No	No	New Onset Diabetes	2021-04-13	2021-04-22	EVENT	Symptoms+	Mild	No	Mild	No	Mild	No	No	Mild	No	No	Mild	No	No	No	No	No	No	Never Smoked	No	No	No	No
1119	2021-03-30	7119	QATAR	Pioglitazone	3	56	Male	80	170	28	0			22	97	92	No	Yes	No	No	No	No	New Onset Diabetes	2021-03-29	2021-04-02	Discharged	Symptoms+	Mild	No	No	No	Mild	No	No	Moderate	No	No	Moderate	No	Mild	No	No	No	No	Never Smoked	No	No	Yes	No
1121	2021-04-01	7121	QATAR	Placebo	2	48	Male	113	176	36	1	11	13	22	96	81	Yes	Yes	No	No	No	No	Known T2DM	2021-03-26	2021-04-03	Discharged	Symptoms+	Moderate	No	Mild	No	Moderate	Mild	No	Mild	No	No	Moderate	No	No	No	No	No	No	Never Smoked	No	No	Yes	No
1122	2021-07-06	7122	KUWAIT	Pioglitazone	4	57	Female	80	160	31	17		17.9	22	96	110	No	No	No	Yes	No	No	Known T2DM	2021-06-29	2021-07-10	EVENT	Symptoms+	No	No	No	No	Mild	No	No	No	No	No	No	No	No	No	No	No	No	Never Smoked	No	No	Yes	Yes
1123	2021-02-24	7123	KUWAIT	Pioglitazone	5	45	Male	90	176	29	5		16.6	22	96	74	No	No	No	Yes	No	No	Known T2DM	2021-02-18	2021-03-01	Discharged	Symptoms+	Moderate	No	No	No	Moderate	No	No	No	No	No	No	No	No	No	No	No	No	Never Smoked	No	No	Yes	Yes
1125	2021-03-16	7125	KUWAIT	Pioglitazone	13	54	Female	104	160	41	5	9.2		22	95	82	Yes	No	No	Yes	No	No	Known T2DM	2021-03-12	2021-03-29	Discharged	Symptoms+	Moderate	No	Moderate	No	Moderate	No	No	No	No	No	No	Moderate	No	No	No	No	No	Never Smoked	No	No	Yes	Yes
1127	2021-05-04	7127	QATAR	Placebo	12	70	Male	74	190	20	15	12.8	15.9	20	100	89	Yes	No	No	Yes	No	No	Known T2DM	2021-05-03	2021-05-16	Discharged	Symptoms+	Moderate	Mild	Mild	No	Mild	No	No	No	No	No	Mild	Mild	No	No	No	No	No	Never Smoked	No	No	Yes	Yes
1128	2021-04-24	7128	QATAR	Pioglitazone	10	42	Male	97	171	33	0	6.7	8.5	20	97	20	No	Yes	No	No	No	No	New Onset Diabetes	2021-04-21	2021-05-04	Discharged	Symptoms+	No	No	No	No	Moderate	No	No	No	No	No	No	No	No	No	No	Moderate	No	Never Smoked	No	No	No	No
1129	2021-01-25	7129	KUWAIT	Placebo	4	71	Female	59	152	26	20	4.5	7	22	98	90	No	No	No	Yes	No	No	Known T2DM	2021-01-20	2021-01-29	Discharged	Symptoms+	No	No	No	No	Moderate	No	No	No	No	No	Moderate	No	No	No	No	No	No	Never Smoked	No	No	Yes	Yes
1130	2021-03-30	7130	QATAR	Placebo	7	47	Male	90	173	30	10	12.7	23.8	24	95	84	No	Yes	No	Yes	No	No	Known T2DM	2021-03-30	2021-04-06	Discharged	Symptoms+	Mild	No	No	No	Mild	No	No	Mild	No	No	No	No	No	No	No	No	No	Never Smoked	No	No	Yes	Yes
1132	2021-03-29	7132	KUWAIT	Pioglitazone	6	58	Female	68	168	24	1		9	22	95	60	No	No	No	Yes	No	No	Known T2DM	2021-03-28	2021-04-04	Discharged	Symptoms+	Moderate	No	No	No	No	No	No	No	No	No	No	Moderate	No	No	No	No	No	Never Smoked	No	No	Yes	Yes
1133	2021-02-10	7133	KUWAIT	Placebo	27	75	Male	74	175	24	10	6.5		22	95	82	No	No	No	Yes	No	No	Known T2DM	2021-02-07	2021-03-09	Discharged	Symptoms+	No	No	No	No	Moderate	No	No	Mild	No	No	No	No	No	No	No	No	No	Never Smoked	No	No	Yes	Yes
1134	2021-08-03	7134	KUWAIT	Pioglitazone	4	56	Female	104	156	43	8		7.3	22	94	60	No	Yes	No	Yes	No	No	Known T2DM	2021-07-30	2021-08-07	EVENT	Symptoms+	Moderate	No	No	No	Moderate	Moderate	No	Moderate	No	No	No	No	No	No	No	No	No	Currently smoker	No	No	Yes	Yes
1135	2021-02-21	7135	KUWAIT	Placebo	45	47	Male	135	180	42	6		16.6	24	90	94	No	No	No	No	No	No	Known T2DM	2021-02-16	2021-04-07	Died	Symptoms+	Moderate	No	No	No	Moderate	No	No	Moderate	No	No	No	No	No	No	No	No	No	Never Smoked	No	No	Yes	No
1136	2021-03-16	7136	KUWAIT	Placebo	2	45	Male	90	180	28	15	11.2		22	98	78	Yes	Yes	No	No	Yes	No	Known T2DM	2021-03-05	2021-03-18	Discharged	Symptoms+	No	No	Moderate	No	Moderate	No	No	Moderate	No	No	No	No	No	No	No	No	No	Never Smoked	No	No	Yes	Yes
1141	2021-07-28	7141	KUWAIT	Placebo	7	62	Female	130	165	48	20		20	26	96	60	Yes	Yes	No	Yes	No	No	Known T2DM	2021-07-19	2021-08-04	Discharged	Symptoms+	Moderate	No	No	No	Moderate	No	No	Moderate	No	No	No	No	No	No	No	No	No	Never Smoked	No	No	Yes	Yes
1142	2021-03-16	7142	KUWAIT	Placebo	6	66	Male	79	165	29	15		6.4	24	96	102	No	No	No	Yes	No	Yes	Known T2DM	2021-03-09	2021-03-22	Discharged	Symptoms+	No	No	No	No	Moderate	No	No	No	No	No	Moderate	No	No	No	No	No	No	Never Smoked	No	No	Yes	Yes
1143	2021-03-19	7143	KUWAIT	Pioglitazone	6	58	Female	72	156	30	5	4.6		22	95	80	Yes	Yes	No	No	No	No	Known T2DM	2021-03-08	2021-03-25	Discharged	Symptoms+	Moderate	No	No	No	No	No	No	No	No	No	No	Moderate	Moderate	No	No	No	No	Never Smoked	No	No	Yes	No
1144	2021-03-23	7144	KUWAIT	Placebo	12	52	Female	92	158	37	2		8.2	22	96	74	No	No	No	No	No	No	Known T2DM	2021-03-18	2021-04-04	Discharged	Symptoms+	No	No	Moderate	No	Moderate	No	No	Mild	No	No	No	Moderate	No	No	No	No	No	Never Smoked	No	No	Yes	No
1145	2021-04-14	7145	QATAR	Placebo	4	43	Male	68	168	24	0	13.3	27.4	22	95	60	Yes	Yes	No	No	No	No	Known T2DM	2021-04-09	2021-04-18	Discharged	Symptoms+	Mild	No	No	No	Mild	No	No	Mild	No	No	No	No	No	No	No	No	No	Currently smoker	No	No	Yes	No
1146	2021-03-26	7146	KUWAIT	Pioglitazone	3	52	Female	80	162	30	0		13.3	22	96	72	No	No	No	No	No	No	Known T2DM	2021-03-14	2021-03-29	Discharged	Symptoms+	Moderate	No	No	No	Moderate	No	No	Moderate	No	No	No	No	No	No	No	No	No	Never Smoked	No	No	Yes	No
1147	2021-04-08	7147	QATAR	Pioglitazone	2	34	Male	62	168	22	0	9	12	23	95	68	Yes	Yes	No	No	No	No	Known T2DM	2021-04-05	2021-04-10	Discharged	Symptoms+	Moderate	No	No	No	Moderate	No	No	Severe	Mild	No	No	No	No	No	No	No	No	Never Smoked	No	No	Yes	No
1148	2021-03-15	7148	QATAR	Pioglitazone	62	52	Male	74	167	27	0	17.2	0	21	98	88	Yes	Yes	No	No	No	No	New Onset Diabetes	2021-06-14	2021-05-16	Discharged	Symptoms+	No	No	No	No	Moderate	No	No	No	No	No	No	No	No	No	No	No	No	Never Smoked	No	No	No	No
1149	2021-08-04	7149	KUWAIT	Placebo	7	58	Female	95	160	37	10		9.9	20	97	72	No	Yes	No	Yes	No	No	Known T2DM	2021-07-29	2021-08-11	Discharged	Symptoms+	Moderate	No	No	No	Moderate	No	No	Moderate	No	No	No	No	No	No	No	No	No	Never Smoked	No	No	Yes	Yes
1150	2021-04-14	7150	KUWAIT	Pioglitazone	6	55	Male	101	165	37	2	15	11	22	97	85	No	Yes	No	Yes	No	No	Known T2DM	2021-04-10	2021-04-20	Discharged	Symptoms+	Moderate	No	No	No	Moderate	Moderate	No	No	No	No	No	No	No	No	No	No	No	Never Smoked	No	No	Yes	No
1151	2021-03-30	7151	KUWAIT	Pioglitazone	5	61	Male	78.6	170	27	10	14		22	95	82	Yes	Yes	No	No	No	Yes	Known T2DM	2021-03-22	2021-04-04	Discharged	Symptoms+	Moderate	No	No	No	Moderate	No	No	Moderate	No	No	Moderate	No	No	No	No	No	No	Never Smoked	No	No	Yes	No
1152	2021-03-22	7152	KUWAIT	Placebo	13	54	Female	65	158	26	20		14.7	22	94	82	Yes	No	No	Yes	No	No	Known T2DM	2021-03-16	2021-04-04	Discharged	Symptoms+	No	No	No	No	Moderate	No	No	No	No	No	No	Moderate	No	No	No	No	No	Never Smoked	No	No	Yes	Yes
1153	2021-03-29	7153	KUWAIT	Pioglitazone	6	68	Male	70	175	23	5	11	13	18	94	80	No	No	No	No	No	No	Known T2DM	2021-03-27	2021-04-04	Discharged	Symptoms+	Moderate	No	No	No	Moderate	Moderate	No	Moderate	No	No	No	No	No	No	No	No	No	Never Smoked	No	No	Yes	No
1155	2021-08-03	7155	KUWAIT	Pioglitazone	12	50	Female	139	153	59	22		18.6	28	95	75	Yes	Yes	No	Yes	No	Yes	Known T2DM	2021-07-24	2021-08-15	Discharged	Symptoms+	Moderate	No	No	No	Moderate	No	No	No	No	No	No	No	No	No	No	No	No	Never Smoked	No	No	Yes	Yes
1156	2021-07-12	7156	KUWAIT	Placebo	3	40	Female	101	159	40	11		22	24	98	86	Yes	Yes	No	Yes	No	No	Known T2DM	2021-06-26	2021-07-15	Discharged	Symptoms+	Moderate	No	No	No	Moderate	No	No	Moderate	No	No	No	No	No	No	No	Moderate	No	Never Smoked	No	No	Yes	Yes
1157	2021-03-23	7157	KUWAIT	Placebo	6	32	Male	103	167	37	0	12.9		24	95	72	No	No	No	No	No	No	New Onset Diabetes	2021-03-18	2021-03-29	Discharged	Symptoms+	No	No	Moderate	No	Mild	No	No	Mild	No	No	Moderate	Moderate	No	No	No	No	No	Never Smoked	No	No	No	No
1158	2021-07-28	7158	KUWAIT	Placebo	2	50	Female	96	170	33	15		17	24	96	92	Yes	No	No	No	No	No	Known T2DM	2021-07-21	2021-07-30	Discharged	Symptoms+	Moderate	No	No	No	Moderate	No	No	Moderate	No	No	No	No	Moderate	No	No	No	No	Never Smoked	No	No	Yes	No
1160	2021-03-31	7160	QATAR	Pioglitazone	2	31	Male	70	170	24	0	8	12	23	95	76	Yes	Yes	No	No	No	No	Known T2DM	2021-03-29	2021-04-02	Discharged	Symptoms+	Mild	No	Mild	No	Moderate	Mild	No	Mild	No	No	No	No	No	No	No	No	No	Never Smoked	No	No	Yes	No
1163	2021-04-14	7163	QATAR	Pioglitazone	17	60	Male	68	172	23	10	23	16.4	22	98	65	Yes	Yes	No	No	No	No	Known T2DM	2021-04-13	2021-05-01	Discharged	Symptoms+	Mild	No	No	No	Mild	No	No	Mild	No	No	No	Mild	No	No	No	No	No	Never Smoked	No	No	Yes	No
1164	2021-07-27	7164	KUWAIT	Placebo	6	69	Female	86	156	35	37		17.4	24	96	66	Yes	No	No	Yes	No	No	Known T2DM	2021-07-21	2021-08-02	Discharged	Symptoms+	Moderate	No	No	No	Moderate	No	No	Moderate	No	No	Moderate	No	No	No	Moderate	No	No	Never Smoked	No	Yes	Yes	Yes
1166	2021-03-09	7166	KUWAIT	Pioglitazone	14	35	Male	70	160	27	0	16	16	20	94	80	No	No	No	No	No	No	New Onset Diabetes	2021-03-09	2021-03-23	Discharged	Symptoms+	Moderate	No	No	No	Moderate	No	No	Moderate	No	No	No	No	No	No	No	No	No	Never Smoked	No	No	No	No
1167	2021-04-25	7167	QATAR	Placebo	10	58	Male	70	160	27	5	7.6	5.6	20	96	88	No	Yes	Yes	Yes	No	Yes	New Onset Diabetes	2021-04-25	2021-05-05	Discharged	Symptoms+	Mild	No	No	No	Mild	No	No	Moderate	No	No	No	No	No	No	No	No	No	Never Smoked	No	No	No	No
1168	2021-04-20	7168	KUWAIT	Pioglitazone	6	48	Male	98	183	29	14	16	14.1	22	95	102	Yes	No	No	No	No	No	Known T2DM	2021-04-14	2021-04-26	Discharged	Symptoms+	No	No	No	No	Mild	No	No	Mild	No	No	Moderate	No	No	No	No	No	No	Past Smoker	No	No	Yes	No
1169	2021-07-05	7169	KUWAIT	Pioglitazone	2	64	Male	100	179	31	27		9.4	22	96	76	Yes	No	No	Yes	No	No	Known T2DM	2021-07-02	2021-07-07	Discharged	Symptoms+	No	No	No	No	Severe	No	No	No	No	No	No	No	No	No	No	No	No	Never Smoked	No	No	Yes	Yes
1171	2021-04-12	7171	KUWAIT	Pioglitazone	2	51	Male	119	175	39	15	9.2	10.1	24	95	112	No	No	No	No	No	Yes	Known T2DM	2021-04-03	2021-04-14	Discharged	Symptoms+	No	No	No	No	Moderate	No	No	No	No	No	No	Moderate	No	Moderate	No	No	No	Never Smoked	No	No	Yes	No
1173	2021-07-05	7173	KUWAIT	Pioglitazone	9	56	Female	65	160	25	2	7.3		34	98	68	No	No	No	No	No	No	Known T2DM	2021-06-27	2021-07-14	EVENT	Symptoms+	No	No	No	No	Mild	No	No	Mild	No	No	No	No	No	Mild	No	No	No	Never Smoked	No	No	Yes	No
1174	2021-03-29	7174	KUWAIT	Placebo	16	64	Male	82	163	31	13		14.3	22	95	85	No	No	No	Yes	No	No	Known T2DM	2021-03-05	2021-04-14	Discharged	Symptoms+	Moderate	No	No	No	Moderate	No	No	Moderate	No	No	Moderate	No	No	No	No	No	No	Never Smoked	No	No	Yes	Yes
1175	2021-04-08	7175	KUWAIT	Pioglitazone	4	55	Male	135	185	39	10		8.6	22	94	82	Yes	No	No	Yes	No	No	Known T2DM	2021-04-05	2021-04-12	Discharged	Symptoms+	No	No	No	No	Mild	No	No	Mild	No	No	Moderate	Mild	Mild	No	No	No	No	Currently smoker	No	No	Yes	Yes
1176	2021-04-07	7176	KUWAIT	Placebo	13	44	Male	76.5	175	25	9		14.8	22	93	102	No	No	No	No	No	No	Known T2DM	2021-04-03	2021-04-20	Discharged	Symptoms+	Moderate	No	No	No	Moderate	No	No	No	No	No	No	No	No	No	No	No	No	Never Smoked	No	Yes	Yes	No
1179	2021-07-05	7179	KUWAIT	Placebo	2	54	Male	89.5	172	30	6		9.3	22	95	86	No	No	No	No	No	No	Known T2DM	2021-06-26	2021-07-07	Discharged	Symptoms+	Moderate	No	No	No	No	No	No	No	No	No	No	Mild	No	No	No	No	No	Never Smoked	No	No	Yes	No
1182	2021-03-29	7182	QATAR	Placebo	6	51	Male	72	171	25	6	9	12	20	94	81	Yes	Yes	No	Yes	No	No	Known T2DM	2021-03-26	2021-04-04	Discharged	Symptoms+	Moderate	Mild	No	Mild	Moderate	No	No	Mild	No	No	No	Moderate	No	No	No	No	No	Never Smoked	No	No	Yes	Yes
1183	2021-04-08	7183	QATAR	Placebo	4	43	Male	80	156	33	5	8	12	23	97	64	Yes	Yes	No	No	No	No	Known T2DM	2021-04-06	2021-04-12	Discharged	Symptoms+	Moderate	No	No	No	Mild	Moderate	No	Severe	No	No	No	No	No	No	No	No	No	Never Smoked	No	No	Yes	No
1184	2021-07-05	7184	KUWAIT	Pioglitazone	7	52	Male	73	165	27	22		17	24	94	99	Yes	No	No	Yes	No	No	Known T2DM	2021-06-24	2021-07-12	Discharged	Symptoms+	No	No	No	No	Mild	No	No	Mild	No	No	No	Mild	Mild	Mild	No	No	No	Never Smoked	No	No	Yes	Yes
1185	2021-02-22	7185	KUWAIT	Pioglitazone	4	45	Male	83	170	29	1	15.7		20	97	80	Yes	Yes	No	Yes	No	No	Known T2DM	2021-02-06	2021-02-26	Discharged	Symptoms+	Mild	No	No	No	Moderate	No	No	Moderate	No	No	No	No	No	Mild	No	No	No	Currently smoker	No	No	Yes	Yes
1186	2021-02-16	7186	KUWAIT	Pioglitazone	2	65	Male	105	173	35	10		9	22	97	78	Yes	No	No	No	No	No	Known T2DM	2021-02-03	2021-02-18	Discharged	Symptoms+	No	No	No	No	Mild	No	No	No	No	No	No	No	No	No	No	No	No	Never Smoked	No	No	Yes	No
1188	2021-05-19	7188	KUWAIT	Pioglitazone	2	46	Male	94.5	170	33	5		16	20	95	78	No	No	No	No	No	No	Known T2DM	2021-05-17	2021-05-21	Discharged	Symptoms+	Moderate	No	Moderate	No	Moderate	No	No	No	No	No	No	No	Moderate	No	No	No	No	Never Smoked	No	No	Yes	Yes
1189	2021-04-06	7189	KUWAIT	Pioglitazone	8	66	Female	65	158	26	10	13.2	13.1	24	96	78	Yes	Yes	No	Yes	No	No	Known T2DM	2021-04-02	2021-04-14	Discharged	Symptoms+	Moderate	No	Mild	No	Moderate	Mild	Mild	Mild	No	No	Moderate	Severe	No	No	No	No	No	Never Smoked	No	No	Yes	Yes
1192	2021-03-30	7192	KUWAIT	Placebo	1	54	Female	83.5	160	33	1.5		7	23	93	77	No	No	No	No	No	No	Known T2DM	2021-03-23	2021-03-31	Discharged	Symptoms+	Moderate	No	No	No	Moderate	No	No	No	No	No	No	No	Moderate	No	No	No	No	Never Smoked	No	Yes	Yes	No
1195	2021-04-05	7195	KUWAIT	Placebo	9	73	Male	81	156	33	5	4.2		22	96	79	No	No	No	Yes	No	No	Known T2DM	2021-04-03	2021-04-14	Discharged	Symptoms+	Moderate	No	No	No	Moderate	No	No	Moderate	No	No	No	No	No	No	No	No	No	Never Smoked	No	No	Yes	Yes
1197	2021-03-23	7197	KUWAIT	Placebo	6	54	Female	74.4	160	29	17		13.6	22	94	90	No	No	No	No	No	No	Known T2DM	2021-03-16	2021-03-29	Discharged	Symptoms+	Moderate	No	No	No	Mild	No	No	Moderate	No	No	Mild	Mild	No	No	No	No	No	Never Smoked	No	No	Yes	No
1198	2021-04-06	7198	KUWAIT	Placebo	8	54	Male	80	165	29	10	13	15	24	89	80	No	No	No	No	No	No	Known T2DM	2021-04-05	2021-04-14	Discharged	Symptoms+	Moderate	No	No	No	Moderate	No	No	Severe	No	No	Moderate	Moderate	No	No	No	No	No	Never Smoked	No	No	Yes	No
1200	2021-02-24	7200	KUWAIT	Placebo	2	71	Female	90	155	37	5		17.6	22	97	84	No	No	No	Yes	No	No	Known T2DM	2021-02-12	2021-02-26	Discharged	Symptoms+	Moderate	No	No	No	Moderate	No	No	Moderate	No	No	No	Moderate	No	No	No	No	No	Never Smoked	No	No	Yes	Yes
1202	2021-03-19	7202	KUWAIT	Placebo	6	66	Female	97	162	37	5		14	22	96	86	No	No	No	No	No	No	Known T2DM	2021-03-17	2021-03-25	Discharged	Symptoms+	No	No	No	No	Moderate	No	No	Moderate	No	No	No	No	No	No	No	Moderate	No	Never Smoked	No	No	Yes	No
1205	2021-04-29	7205	QATAR	Placebo	7	32	Male	65	161	25	0	13.2	22	20	97	70	Yes	Yes	Yes	No	No	No	Known T2DM	2021-04-23	2021-05-06	Discharged	Symptoms+	Mild	No	No	No	Mild	No	No	Mild	No	No	Mild	No	No	No	No	No	No	Never Smoked	No	No	Yes	No
1206	2021-05-04	7206	QATAR	Pioglitazone	11	57	Male	123	180	38	4	10.3	15.8	22	98	86	No	Yes	No	No	No	No	Known T2DM	2021-05-04	2021-05-15	Discharged	Symptoms+	Moderate	Mild	Moderate	No	Moderate	No	No	No	No	No	No	No	No	No	No	No	No	Never Smoked	No	No	Yes	Yes
1207	2021-05-04	7207	QATAR	Placebo	2	51	Female	80	157	32	10	8.5	11.4	20	98	105	No	No	No	No	No	No	Known T2DM		2021-05-06	Discharged	Asymptomatic	No	No	No	No	No	No	No	No	No	No	No	No	No	No	No	No	No	Never Smoked	No	No	Yes	No
1208	2021-05-26	7208	QATAR	Pioglitazone	3	55	Male	74	167	27	10	6.8	12.2	17	98	78	No	No	No	Yes	No	No	Known T2DM	2021-05-24	2021-05-29	Discharged	Symptoms+	Mild	No	No	No	Moderate	No	No	No	No	No	No	Moderate	No	No	No	No	No	Never Smoked	No	No	Yes	Yes
1209	2021-05-06	7209	QATAR	Placebo	5	59	Male	65	168	23	12	11.2	11.8	20	98	90	Yes	No	No	Yes	No	No	Known T2DM	2021-04-29	2021-05-11	Discharged	Symptoms+	No	No	Moderate	No	No	No	Moderate	No	No	No	No	No	No	No	No	No	No	Never Smoked	No	No	Yes	Yes
1210	2021-05-18	7210	KUWAIT	Placebo	9	51	Male	97	170	34	0		15	22	94	110	No	No	No	No	No	No	New Onset Diabetes	2021-05-12	2021-05-27	Discharged	Symptoms+	Moderate	No	No	No	Moderate	No	No	Moderate	No	No	No	No	Moderate	No	No	No	No	Never Smoked	No	No	No	No
1211	2021-05-04	7211	QATAR	Placebo	2	47	Female	80	159	32	3	10.5	12.6	26	95	85	No	No	No	No	No	No	Known T2DM		2021-05-06	Discharged	Asymptomatic	No	No	No	No	No	No	No	No	No	No	No	No	No	No	No	No	No	Never Smoked	No	No	Yes	No
1213	2021-04-29	7213	QATAR	Pioglitazone	2	41	Male	89	169	31	4	12.4	15.7	18	96	88	Yes	Yes	Yes	No	No	No	Known T2DM	2021-04-25	2021-05-01	EVENT	Symptoms+	Mild	No	No	No	Mild	No	Mild	Moderate	No	No	Mild	No	No	No	No	No	No	Never Smoked	No	No	Yes	No
1214	2021-09-26	7214	QATAR	Pioglitazone	7	65	Male	67.9	157	28	12	7.9	14	20	99	84	Yes	No	No	Yes	No	No	Known T2DM	2021-09-23	2021-10-03	Discharged	Asymptomatic	No	No	No	No	No	No	No	No	No	No	No	No	No	No	No	No	No	Never Smoked	No	No	Yes	Yes
1216	2021-05-26	7216	QATAR	Placebo	3	54	Female	91	158	36	10	12.8	11.1	20	99	83	No	No	No	Yes	No	No	Known T2DM	2021-05-20	2021-05-29	Discharged	Symptoms+	No	No	No	No	No	No	No	No	No	No	No	No	Moderate	No	No	No	No	Never Smoked	No	No	Yes	Yes
1221	2021-09-29	7221	QATAR	Placebo	4	48	Male	76	175	25	0	7	23	20	98	67	No	No	No	No	No	No	Known T2DM	2021-10-28	2021-10-03	Discharged	Symptoms+	No	No	No	No	No	No	No	No	No	No	Mild	No	No	No	No	No	No	Never Smoked	No	No	Yes	No
1222	2021-10-12	7222	QATAR	Pioglitazone	1	79	Male	77	175	25	5	6.3	7.2	17	98	87	No	No	No	Yes	No	No	Known T2DM		2021-10-13	Discharged	Asymptomatic	No	No	No	No	No	No	No	No	No	No	No	No	No	No	No	No	No	Never Smoked	No	No	Yes	No
1223	2021-06-16	7223	QATAR	Pioglitazone	2	56	Male	105	174	35	20	7.7	8.8	20	95	84	Yes	No	No	Yes	No	No	Known T2DM	2021-06-06	2021-06-18	Discharged	Symptoms+	Moderate	No	Moderate	No	Moderate	No	No	Moderate	No	No	Moderate	Moderate	No	No	No	No	No	Never Smoked	No	No	Yes	Yes
1225	2021-10-27	7225	QATAR	Pioglitazone	3	40	Female	68	154	29	2	13.8	12.5	20	99	97	No	No	No	No	No	No	Known T2DM	2021-10-23	2021-10-30	Discharged	Asymptomatic	No	No	No	No	No	No	No	No	No	No	No	No	No	No	No	No	No	Never Smoked	No	Yes	Yes	Yes
1227	2021-04-29	7227	QATAR	Placebo	6	44	Male	68	160	27	0	7.8	10.5	24	94	96	Yes	Yes	No	Yes	No	No	Known T2DM	2021-04-19	2021-05-05	Discharged	Symptoms+	Mild	No	No	No	Mild	No	No	Mild	No	No	No	No	No	No	No	No	No	Never Smoked	No	No	Yes	Yes
1228	2021-10-03	7228	QATAR	Pioglitazone	6	44	Male	66	174	22	0.6	7.9	16.9	20	99	69	Yes	No	No	No	No	No	Known T2DM	2021-09-30	2021-10-09	Discharged	Symptoms+	No	No	No	No	Moderate	No	No	No	No	No	No	No	No	No	No	No	No	Never Smoked	No	No	Yes	No
1229	2021-04-30	7229	QATAR	Pioglitazone	4	36	Male	72	156	30	0	8.7	12.8	22	94	80	No	No	No	No	No	No	New Onset Diabetes	2021-04-26	2021-05-04	Discharged	Symptoms+	Mild	No	No	No	Mild	No	No	Moderate	No	No	Mild	No	No	No	No	No	No	Never Smoked	No	No	No	No
1234	2021-05-05	7234	QATAR	Pioglitazone	12	61	Female	88	159	35	9	4.9	8.2	19	95	89	Yes	Yes	No	No	No	No	Known T2DM		2021-05-17	Discharged	Asymptomatic	No	No	No	No	No	No	No	No	No	No	No	No	No	No	No	No	No	Never Smoked	No	No	Yes	No
1235	2021-11-18	7235	QATAR	Pioglitazone	5	52	Male	100	171.5	34	8	12.6	15.5	19	98	70	No	No	No	Yes	No	No	Known T2DM	2021-11-16	2021-11-23	Discharged	Symptoms+	No	No	No	No	Mild	No	Mild	No	No	No	No	No	No	No	No	No	No	Never Smoked	No	No	Yes	Yes
1237	2021-09-26	7237	QATAR	Pioglitazone	1	65	Male	83	174	27	8	9	14	18	97	74	Yes	No	No	Yes	No	No	Known T2DM	2021-09-24	2021-09-27	Discharged	Symptoms+	Mild	No	Mild	No	Moderate	No	No	Mild	No	No	Moderate	Mild	Mild	No	No	No	No	Never Smoked	No	No	Yes	No
1238	2021-05-09	7238	QATAR	Pioglitazone	9	53	Male	68	167	24	12	12.6	19.4	21	99	74	Yes	No	Yes	No	No	No	Known T2DM	2021-05-06	2021-05-18	Discharged	Symptoms+	Mild	No	No	No	Mild	No	No	Mild	No	No	No	No	No	No	No	No	No	Never Smoked	No	No	Yes	No
1242	2021-06-17	7242	QATAR	Placebo	12	56	Female	62	151	27	5	16.9	15.6	21	95	88	No	No	No	Yes	No	No	Known T2DM	2021-06-16	2021-06-29	Discharged	Symptoms+	Moderate	No	No	No	Mild	No	No	Mild	No	No	No	No	No	No	No	No	No	Never Smoked	No	No	Yes	Yes
1246	2021-05-17	7246	QATAR	Pioglitazone	1	59	Female	71	151	31	5	10.6	8.4	20	95	90	No	No	No	Yes	No	No	Known T2DM		2021-05-18	Discharged	Asymptomatic	No	No	No	No	No	No	No	No	No	No	No	No	No	No	No	No	No	Never Smoked	No	No	Yes	No
1247	2021-05-10	7247	QATAR	Placebo	8	28	Male	78	166	28	0		5.5	20	97	98	No	No	Yes	No	No	No	New Onset Diabetes	2021-05-05	2021-05-18	Discharged	Symptoms+	Mild	No	Mild	No	Mild	No	Mild	No	No	No	No	No	No	No	No	No	No	Never Smoked	No	No	No	No
1249	2021-06-18	7249	QATAR	PLacebo	3	36	Male	77	169	27	0	22.4	16.2	20	98	88	No	No	No	No	No	No	Known T2DM	2021-07-16	2021-06-21	Discharged	Symptoms+	Mild	No	No	No	Mild	No	No	No	No	No	No	No	No	No	No	No	No	Never Smoked	No	No	Yes	No
1250	2021-12-28	7250	QATAR	Pioglitazone	4	46	Female	73.5	163	28	3	5.7	8.9	19	99	88	No	No	No	No	No	No	Known T2DM	2021-12-28	2022-01-01	Discharged	Symptoms+	No	No	No	No	Mild	No	Mild	No	No	No	No	No	No	No	No	No	No	Never Smoked	No	No	Yes	No
1251	2021-04-30	7251	QATAR	Placebo	10	44	Male	92	167	33	0	8.3	14.2	22	94	78	No	No	No	No	No	No	New Onset Diabetes	2021-04-22	2021-05-10	Discharged	Symptoms+	Mild	No	No	No	Mild	No	No	Moderate	No	No	Mild	No	No	No	No	No	No	Never Smoked	No	No	No	No
1253	2021-06-18	7253	QATAR	Pioglitazone	16	55	Male	77	161	30	0	11.8	15.8	20	98	76	No	Yes	No	Yes	No	No	Known T2DM	2021-06-16	2021-07-04	Discharged	Symptoms+	Moderate	No	No	No	Mild	No	No	No	No	No	No	No	No	No	No	No	No	Never Smoked	No	No	Yes	Yes
1254	2021-04-30	7254	QATAR	Pioglitazone	3	36	Male	87.75	157	36	6	6.2	11	21	92	90	No	No	No	Yes	No	No	Known T2DM	2021-04-24	2021-05-03	Discharged	Symptoms+	Mild	No	No	No	Mild	No	No	Mild	No	No	Mild	No	No	No	No	No	No	Never Smoked	No	No	Yes	Yes
1261	2021-05-26	7261	QATAR	Placebo	18	67	Male	85	168	30	0	6.3	8	20	99	99	No	No	No	Yes	No	No	Known T2DM	2021-05-23	2021-06-13	Discharged	Symptoms+	Moderate	No	No	No	Moderate	No	No	No	No	No	No	No	No	No	No	No	No	Never Smoked	No	No	Yes	Yes
1262	2021-06-19	7262	QATAR	Pioglitazone	3	39	Male	68	169	24	10	10.4	11.6	20	99	65	Yes	No	No	Yes	No	No	Known T2DM	2021-06-17	2021-06-22	Discharged	Symptoms+	Moderate	No	No	No	Mild	No	No	No	No	No	No	No	Moderate	No	No	No	No	Never Smoked	No	No	Yes	No
1264	2021-06-20	7264	QATAR	Pioglitazone	45	59	Male	103	168	36	7	16.1	20.5	20	95	85	No	Yes	No	Yes	No	No	Known T2DM	2021-06-19	2021-08-04	Discharged	Symptoms+	Moderate	No	No	No	Moderate	No	No	No	No	No	Moderate	Moderate	No	No	No	No	No	Never Smoked	No	No	Yes	Yes
1267	2021-05-26	7267	QATAR	Pioglitazone	10	35	Male	97	171	33	13	12.3	13.2	20	97	97	No	No	No	No	No	No	Known T2DM	2021-05-22	2021-06-05	Discharged	Symptoms+	Moderate	No	No	No	Mild	No	No	Mild	No	No	No	Moderate	No	No	No	No	No	Never Smoked	No	No	Yes	No
1269	2021-05-01	7269	QATAR	Pioglitazone	8	41	Female	115	171	39	0	16.3	21.2	26	94	71	Yes	Yes	No	No	No	No	Known T2DM	2021-05-05	2021-05-09	Discharged	Symptoms+	Moderate	No	No	No	Moderate	No	No	Moderate	No	No	No	No	No	No	No	No	No	Never Smoked	No	No	Yes	No
1273	2021-07-04	7273	QATAR	Placebo	8	41	Male	108	177	34	1	17.2	20.5	21	96	82	No	No	No	No	No	No	Known T2DM	2021-06-30	2021-07-12	Discharged	Symptoms+	Mild	No	No	No	Mild	No	No	Mild	No	No	Mild	No	No	No	No	No	No	Never Smoked	No	No	Yes	Yes
1275	2021-07-07	7275	QATAR	Pioglitazone	7	37	Male	69.7	165	26	0	6.3	14.6	20	100	78	No	No	No	No	No	No	New Onset Diabetes	2021-07-05	2021-07-14	Discharged	Symptoms+	Mild	No	No	No	Mild	No	No	No	No	No	No	No	No	No	No	No	No	Never Smoked	No	No	No	No
1279	2021-05-24	7279	QATAR	Placebo	1	77	Male	78	164	29	13	5.2	9.4	18	100	63	Yes	Yes	Yes	Yes	No	Yes	New Onset Diabetes		2021-05-25	Discharged	Asymptomatic	No	No	No	No	No	No	No	No	No	No	No	No	No	No	No	No	No	Never Smoked	No	No	No	No
1280	2021-05-10	7280	QATAR	Placebo	7	57	Male	80	159	32	0	9	11	26	96	74	Yes	Yes	No	No	No	No	Known T2DM	2021-05-04	2021-05-17	Discharged	Symptoms+	Mild	No	No	No	Moderate	Mild	No	Mild	No	No	No	No	No	No	No	No	No	Never Smoked	No	No	Yes	No
1282	2021-05-27	7282	QATAR	Pioglitazone	4	51	Male	71	160	28	4	12.3	14	19	97	63	No	Yes	No	No	No	No	Known T2DM	2021-05-21	2021-05-31	Discharged	Symptoms+	Moderate	No	No	No	No	No	Mild	Moderate	No	No	No	No	No	No	No	No	No	Never Smoked	No	No	Yes	No
1285	2021-07-07	7285	QATAR	Pioglitazone	7	46	Male	72	170	25	0	9.1	8.4	20	98	80	No	No	No	No	No	No	New Onset Diabetes	2021-07-05	2021-07-14	Discharged	Symptoms+	Moderate	No	No	No	Mild	No	Mild	No	No	No	No	Mild	Mild	No	No	No	No	Never Smoked	No	No	No	No
1288	2021-05-16	7288	QATAR	Placebo	8	72	Male	80	163	30	18	18.7	10	22	96	61	No	Yes	Yes	Yes	Yes	No	Known T2DM	2021-05-12	2021-05-24	EVENT	Symptoms+	Mild	No	No	No	Moderate	No	No	Mild	No	No	Moderate	Mild	No	No	No	No	No	Never Smoked	No	No	Yes	Yes
1294	2021-10-31	7294	QATAR	Pioglitazone	2	64	Male	87.1	163	33	4	6.5	8.7	18	98	71	No	No	No	No	No	No	Known T2DM	2021-10-26	2021-11-02	Discharged	Symptoms+	No	No	No	No	No	No	No	No	No	No	No	No	No	Moderate	No	No	No	Never Smoked	No	Yes	Yes	Yes
1296	2021-10-17	7296	QATAR	Pioglitazone	1	52	Female	80	160	31	10	12	15	22	92	107	Yes	Yes	No	No	No	No	New Onset Diabetes		2021-10-18	Discharged	Asymptomatic	No	No	No	No	No	No	No	No	No	No	No	No	No	No	No	No	No	Never Smoked	No	No	No	No
1297	2021-12-29	7297	QATAR	Pioglitazone	2	37	Male	96	162	37	11	11.1	9.9	20	96	80	Yes	No	No	No	No	No	Known T2DM	2021-12-26	2021-12-31	Discharged	Symptoms+	No	No	No	Mild	Mild	No	Mild	No	No	No	No	No	No	No	No	No	No	Never Smoked	No	No	Yes	No
1298	2021-07-07	7298	QATAR	Placebo	11	54	Male	68	180	25	12	13.8	19.5	20	98	89	No	No	No	No	No	No	Known T2DM	2021-07-07	2021-07-18	Discharged	Symptoms+	No	No	Mild	No	Mild	No	Mild	No	No	No	No	No	No	No	No	Mild	No	Never Smoked	No	No	Yes	Yes
1299	2021-05-27	7299	QATAR	Pioglitazone	2	28	Male	73	183	22	0	Not done	23.9	20	100	73	No	No	No	No	No	No	Known T2DM	2021-05-17	2021-05-29	Discharged	Symptoms+	Moderate	No	No	No	Moderate	No	No	No	No	No	No	No	No	No	No	No	No	Never Smoked	No	No	Yes	No
1303	2021-05-28	7303	QATAR	Placebo	3	42	Male	82	162	31	0	Not done	12.7	21	96	82	Yes	Yes	No	No	No	No	Known T2DM	2021-05-23	2021-05-31	Discharged	Symptoms+	Moderate	No	No	No	No	No	No	Moderate	No	No	Moderate	No	No	No	No	No	No	Never Smoked	No	No	Yes	No
1306	2021-05-02	7306	QATAR	Placebo	6	42	Male	60	166	22	3	15	17	24	96	80	Yes	Yes	No	Yes	No	No	Known T2DM	2021-04-27	2021-05-08	Discharged	Symptoms+	Moderate	No	No	No	Moderate	Moderate	No	Mild	No	No	Mild	No	No	No	No	No	No	Never Smoked	No	No	Yes	Yes
1308	2021-07-12	7308	QATAR	Placebo	9	35	Female	58	159	23	0	6.6	7	20	99	65	No	No	No	No	No	No	New Onset Diabetes	2021-07-11	2021-07-21	Discharged	Symptoms+	Mild	No	No	No	Mild	No	No	No	No	No	No	No	No	No	No	No	No	Never Smoked	No	No	No	No
1311	2021-05-24	7311	QATAR	Pioglitazone	1	77	Male	72	165	26	22	9	10	24	95	90	Yes	Yes	Yes	Yes	No	No	Known T2DM		2021-05-25	Discharged	Asymptomatic	No	No	No	No	No	No	No	No	No	No	No	No	No	No	No	No	No	Never Smoked	No	No	Yes	No
1312	2021-10-18	7312	QATAR	Placebo	3	62	Female	92	160	36	20	11	15	18	99	78	Yes	No	No	Yes	No	No	Known T2DM	2021-10-12	2021-10-21	Discharged	Symptoms+	No	No	Mild	Mild	Mild	No	No	No	No	No	No	No	No	No	No	Mild	No	Never Smoked	No	No	Yes	No
1317	2021-05-30	7317	QATAR	Placebo	4	58	Male	68	158	27	6	16.3	17.9	20	98	100	No	No	No	Yes	No	No	Known T2DM	2021-05-27	2021-06-03	Discharged	Symptoms+	Moderate	No	Moderate	No	Moderate	No	No	No	No	No	No	Moderate	No	No	No	No	No	Never Smoked	No	No	Yes	Yes
1318	2021-05-19	7318	QATAR	Placebo	11	35	Male	90	160	35	0	7	7.8	23	95	60	No	Yes	No	No	No	No	New Onset Diabetes	2021-05-16	2021-05-30	Discharged	Symptoms+	No	No	No	No	Mild	No	No	Mild	No	No	No	No	No	No	No	No	No	Never Smoked	No	No	Yes	No
1321	2021-05-02	7321	QATAR	Pioglitazone	7	30	Male	71	159	28	1	9.7	11.2	26	98	74	Yes	Yes	No	No	No	No	New Onset Diabetes	2021-04-24	2021-05-09	Discharged	Symptoms+	Moderate	No	No	No	Mild	Moderate	No	Moderate	No	No	No	No	No	No	No	No	No	Never Smoked	No	No	No	No
1323	2021-05-02	7323	QATAR	Placebo	8	46	Male	70	160	27	1	14	15.5	24	98	70	Yes	Yes	No	No	No	No	Known T2DM	2021-04-27	2021-05-10	EVENT	Symptoms+	Severe	No	No	No	Mild	Moderate	No	Moderate	No	No	No	No	No	No	No	No	No	Never Smoked	No	No	Yes	No
1325	2021-05-30	7325	QATAR	Pioglitazone	10	38	Male	81.7	166	30	2	13.5	15.3	20	96	92	No	Yes	No	No	No	No	Known T2DM	2021-05-28	2021-06-09	Discharged	Symptoms+	No	No	No	No	Moderate	No	No	Moderate	No	No	No	No	No	No	No	No	No	Never Smoked	No	No	Yes	No
1331	2021-05-30	7331	QATAR	Placebo	11	40	Male	64	158	26	4	13.9	25.6	20	98	84	Yes	No	No	No	No	No	Known T2DM	2021-05-28	2021-06-10	Discharged	Symptoms+	Mild	No	No	No	Mild	No	No	Moderate	No	No	No	Mild	Mild	No	Moderate	No	No	Never Smoked	No	No	Yes	No
1334	2022-02-20	7334	QATAR	Placebo	4	40	Male	52.9	160	21	10	9.2	6.6	19	99	81	Yes	No	No	No	No	No	Known T2DM	2022-02-17	2022-02-24	Discharged	Asymptomatic	No	No	No	No	No	No	No	No	No	No	No	No	No	No	No	No	No	Never Smoked	No	No	Yes	No
1337	2021-10-14	7337	QATAR	Pioglitazone	5	55	Female	65.4	152	28	6	4.8	5.8	20	97	63	No	No	No	Yes	No	No	Known T2DM	2021-10-13	2021-10-19	Discharged	Symptoms+	Mild	No	No	Mild	No	No	No	No	No	No	No	No	Mild	No	No	No	No	Never Smoked	No	No	Yes	No
1338	2021-05-31	7338	QATAR	Pioglitazone	1	41	Male	60	164	22	4	8.7	10	18	100	100	Yes	No	No	No	No	No	Known T2DM		2021-06-01	Discharged	Asymptomatic	No	No	No	No	No	No	No	No	No	No	No	No	No	No	No	No	No	Never Smoked	No	No	Yes	No
1339	2021-05-02	7339	QATAR	Pioglitazone	7	44	Male	66	154	28	0	7.4	8.5	23	98	68	Yes	Yes	No	No	No	No	New Onset Diabetes	2021-04-24	2021-05-09	Discharged	Symptoms+	Mild	No	No	No	Mild	Moderate	No	Moderate	No	No	No	No	No	No	No	No	No	Never Smoked	No	No	No	No
1342	2021-05-30	7342	QATAR	Pioglitazone	7	47	Male	64	160	25	0	5.3	9.3	22	97	106	Yes	No	No	Yes	No	No	Known T2DM	2021-05-25	2021-06-06	Discharged	Symptoms+	Moderate	No	No	No	Moderate	No	No	No	No	No	No	Moderate	No	No	No	No	No	Never Smoked	No	No	Yes	Yes
1344	2021-05-26	7344	QATAR	Placebo	2	47	Male	74	162.4	28	0	8.3		24	95	75	No	Yes	No	No	No	No	New Onset Diabetes	2021-05-24	2021-05-28	Discharged	Symptoms+	Moderate	No	No	No	Mild	No	No	Mild	No	No	No	Mild	No	No	No	No	No	Never Smoked	Yes	No	No	No
1345	2021-07-12	7345	QATAR	Placebo	3	46	Male	54	154	23	5	12.5	11	19	100	86	Yes	No	No	No	No	No	Known T2DM	2021-07-08	2021-07-15	Discharged	Asymptomatic	No	No	No	No	No	No	No	No	No	No	No	No	No	No	No	No	No	Never Smoked	No	No	Yes	No
1347	2021-07-11	7347	QATAR	Pioglitazone	7	59	Male	58.6	141	29	15	2.6	15	21	99	71	Yes	No	No	No	No	No	Known T2DM	2021-07-09	2021-07-18	Discharged	Symptoms+	No	No	No	No	Mild	No	No	No	No	No	No	No	No	No	No	No	No	Never Smoked	No	No	Yes	No
1350	2021-05-30	7350	QATAR	Pioglitazone	9	39	Male	63	166	23	0	Not done	7.2	24	97	89	No	No	No	No	No	No	Known T2DM	2021-05-25	2021-06-08	Discharged	Symptoms+	Moderate	No	No	No	Moderate	No	No	Moderate	No	No	No	No	No	No	No	No	No	Never Smoked	No	No	Yes	No
1351	2021-05-30	7351	QATAR	Pioglitazone	14	64	Male	70	167	25	3	11.3	18	21	98	60	Yes	Yes	No	No	No	No	Known T2DM	2021-05-23	2021-06-13	Discharged	Symptoms+	No	No	No	No	Moderate	No	No	Moderate	No	No	No	No	No	No	No	No	No	Never Smoked	No	No	Yes	Yes
1353	2021-05-31	7353	QATAR	Placebo	1	66	Female	83.5	163	31	12	13.8	7.5	21	99	72	Yes	Yes	No	Yes	No	No	Known T2DM	2021-05-30	2021-06-01	EVENT	Symptoms+	Moderate	No	No	No	Moderate	Mild	No	Mild	No	No	No	No	No	No	No	No	No	Never Smoked	No	No	Yes	Yes
1356	2021-10-31	7356	QATAR	Placebo	6	50	Male	71.3	168	25	0	7.7	8.2	21	98	52	No	No	No	Yes	No	No	New Onset Diabetes	2021-10-25	2021-11-06	Discharged	Symptoms+	Mild	No	Mild	No	Moderate	No	No	No	No	No	Mild	Mild	Mild	No	No	No	No	Never Smoked	No	No	No	No
1357	2021-09-22	7357	QATAR	Placebo	13	39	Male	89	168	32	8	13.5	14.5	22	98	78	Yes	No	Yes	No	No	No	Known T2DM	2021-09-21	2021-10-05	Discharged	Symptoms+	No	No	Mild	No	Mild	No	No	No	No	No	Mild	Moderate	No	No	No	No	No	Never Smoked	No	No	Yes	No
1359	2021-05-31	7359	QATAR	Pioglitazone	1	74	Female	58	160	23	14	6.6	9.9	18	97	85	No	No	No	No	No	No	New Onset Diabetes		2021-06-01	Discharged	Asymptomatic	No	No	No	No	No	No	No	No	No	No	No	No	No	No	No	No	No	Never Smoked	No	No	No	No
1364	2022-01-02	7364	QATAR	Pioglitazone	3	63	Male	84	175	27	10	18.4	18	20	98	110	No	No	Yes	No	No	No	Known T2DM	2021-12-28	2022-01-05	Discharged	Symptoms+	Mild	No	No	No	Mild	No	No	Moderate	No	No	No	No	No	No	No	No	No	Never Smoked	No	No	Yes	No
1365	2021-09-28	7365	QATAR	Placebo	4	55	Male	126	183	38	14	7.4	7.1	22	98	98	Yes	No	No	Yes	No	No	Known T2DM	2021-09-27	2021-10-02	Discharged	Symptoms+	No	No	No	No	Moderate	No	No	No	No	No	No	No	No	No	No	No	No	Never Smoked	No	No	Yes	Yes
1368	2021-03-06	7368	QATAR	Placebo	99	43	Male	86.3	169	30	0.5	11.3	16.1	22	94	72	Yes	Yes	No	No	No	No	New Onset Diabetes	2021-05-22	2021-06-13	Discharged	Symptoms+	Mild	No	No	No	Mild	No	No	Moderate	No	No	No	No	No	No	No	No	No	Never Smoked	No	No	No	No
1369	2021-06-07	7369	QATAR	Placebo	1	57	Female	91	154	38	10	9.5	9.8	19	99	80	No	No	No	Yes	Yes	No	Known T2DM		2021-06-08	Discharged	Asymptomatic	No	No	No	No	No	No	No	No	No	No	No	No	No	No	No	No	No	Never Smoked	No	No	Yes	No
1371	2021-07-14	7371	QATAR	Pioglitazone	12	44	Female	75	155	31	0	8.9	9.2	20	99	79	No	No	No	No	No	No	New Onset Diabetes	2021-07-14	2021-07-26	Discharged	Symptoms+	No	No	No	No	Moderate	No	No	No	No	No	No	No	No	No	No	No	No	Never Smoked	No	No	No	No
1374	2021-07-26	7374	QATAR	Pioglitazone	13	50	Male	64	168	23	10	5.8	7.4	20	98	80	No	No	No	No	No	No	Known T2DM	2021-07-24	2021-08-08	Discharged	Symptoms+	Moderate	No	No	No	No	No	No	No	No	No	No	No	No	Moderate	No	No	No	Never Smoked	No	No	Yes	No
1376	2021-06-07	7376	QATAR	Pioglitazone	1	54	Female	102	155	42	10	5.4	6.8	20	92	68	No	Yes	No	No	No	No	Known T2DM		2021-06-08	Discharged	Asymptomatic	No	No	No	No	No	No	No	No	No	No	No	No	No	No	No	No	No	Never Smoked	No	No	Yes	No
1385	2021-05-30	7385	QATAR	Placebo	3	33	Male	71	161	27	11	10.3	8.3	20	97	93	No	No	No	No	No	No	Known T2DM	2021-05-21	2021-06-02	Discharged	Symptoms+	Moderate	No	No	No	Moderate	No	No	No	No	No	Moderate	No	No	No	No	No	No	Never Smoked	No	No	Yes	No
1388	2021-06-05	7388	QATAR	Placebo	10	37	Female	66.7	164	25	6	14.6	16	21	94	100	No	Yes	No	No	No	No	Known T2DM	2021-05-31	2021-06-15	Discharged	Symptoms+	Moderate	Moderate	No	No	Mild	No	No	No	No	No	No	No	No	No	No	No	No	Never Smoked	No	No	Yes	No
1399	2021-10-12	7399	QATAR	Pioglitazone	2	40	Male	97.1	176	31	13	8.9	10.9	21	98	77	No	No	No	No	No	No	Known T2DM	2021-10-06	2021-10-14	Discharged	Symptoms+	No	No	No	No	Mild	No	No	Mild	No	No	No	No	No	No	No	No	No	Never Smoked	No	No	Yes	No
1402	2021-09-28	7402	QATAR	Pioglitazone	8	36	Female	52.9	159	21	0	8.1	11.9	18	98	82	No	No	No	No	No	No	New Onset Diabetes	2021-09-27	2021-10-06	Discharged	Symptoms+	No	No	Mild	No	Mild	No	Mild	No	No	No	No	Mild	Mild	Mild	No	No	No	Never Smoked	No	No	No	No
1407	2022-01-12	7407	QATAR	Pioglitazone	5	51	Female	150	177	48	11	7.4	11.1	21	97	76	Yes	No	Yes	Yes	No	No	Known T2DM	2022-01-11	2022-01-17	Discharged	Symptoms+	Mild	No	No	Moderate	Moderate	No	No	Moderate	No	No	No	No	No	No	No	No	No	Never Smoked	No	No	Yes	Yes
1411	2021-05-30	7411	QATAR	Pioglitazone	5	27	Male	66	160	26	0	Not done	18.1	20	94	80	No	No	No	No	No	No	New Onset Diabetes	2021-05-30	2021-06-04	EVENT	Symptoms+	Mild	No	No	No	Mild	No	No	Mild	No	No	No	No	No	No	No	No	No	Never Smoked	No	No	No	No
1414	2021-08-11	7414	QATAR	Pioglitazone	8	36	Male	81	174	27	0	5.1	6.9	21	96	90	No	No	No	No	No	No	New Onset Diabetes	2021-08-16	2021-08-19	Discharged	Symptoms+	Mild	No	No	No	Mild	No	Mild	No	No	No	Mild	No	No	No	No	No	No	Never Smoked	No	No	No	No
1419	2022-01-05	7419	QATAR	Pioglitazone	6	54	Male	55	170	19	0	9.8	12.3	20	98	92	No	No	No	No	No	No	New Onset Diabetes	2022-01-03	2022-01-11	Discharged	Symptoms+	Mild	No	No	No	Mild	No	No	No	No	No	Mild	No	No	No	No	No	No	Never Smoked	No	No	No	No
1426	2021-07-13	7426	QATAR	Placebo	4	43	Female	77	162	29	1	6.1	6.9	20	97	83	No	No	No	No	No	No	Known T2DM	2021-07-12	2021-07-17	Discharged	Symptoms+	No	No	No	No	No	No	No	No	No	No	No	No	Mild	Mild	No	No	No	Never Smoked	No	No	Yes	No
1427	2021-06-06	7427	QATAR	Placebo	6	47	Male	82	165	30	8	11.2	16	20	99	82	Yes	No	No	No	No	No	Known T2DM	2021-06-04	2021-06-12	Discharged	Symptoms+	Mild	No	No	No	No	No	Moderate	No	No	No	No	No	No	No	No	No	No	Never Smoked	No	No	Yes	No
1429	2021-08-22	7429	QATAR	Pioglitazone	3	59	Male	75	175	24	0	7.5	8	20	97	73	No	No	No	No	No	No	New Onset Diabetes	2021-08-22	2021-08-25	Discharged	Symptoms+	Mild	No	No	No	Mild	No	No	Mild	No	No	No	No	No	No	No	No	No	Never Smoked	No	No	No	Yes
1430	2021-07-14	7430	QATAR	Placebo	15	39	Male	88	172	30	11	7.7	15.2	19	99	80	No	No	No	No	No	No	Known T2DM	2021-07-13	2021-07-29	Discharged	Symptoms+	No	No	No	No	Mild	No	No	No	No	No	Mild	No	No	No	No	No	No	Never Smoked	Yes	No	Yes	Yes
1432	2021-06-13	7432	QATAR	Pioglitazone	1	49	Male	51.6	162	20	6	35.7	18.6	19	100	75	Yes	No	No	No	No	No	Known T2DM	2021-06-09	2021-06-14	Discharged	Asymptomatic	No	No	No	No	No	No	No	No	No	No	No	No	No	No	No	No	No	Never Smoked	No	No	Yes	No
1443	2021-05-30	7443	QATAR	Pioglitazone	3	40	Female	69	156	28	3	9.5	17.8	19	96	70	No	No	No	No	No	No	Known T2DM	2021-05-30	2021-06-02	Discharged	Symptoms+	Moderate	No	No	No	Moderate	No	No	No	No	No	Moderate	No	No	No	No	No	No	Never Smoked	No	No	Yes	No
1448	2021-10-31	7448	QATAR	Placebo	11	49	Female	49.8	147	23	5	4.5	8.8	17	99	73	No	No	No	No	No	No	Known T2DM	2021-10-25	2021-11-11	Discharged	Symptoms+	No	No	No	No	No	No	No	No	No	No	No	No	Moderate	No	No	No	No	Never Smoked	No	No	Yes	No
1450	2021-06-13	7450	QATAR	Pioglitazone	16	39	Male	75.2	173	25	3	11.4	10.4	20	99	76	No	Yes	No	No	No	No	Known T2DM	2021-06-11	2021-06-29	Discharged	Symptoms+	No	No	No	No	Moderate	Moderate	No	Moderate	Mild	No	No	No	No	Mild	No	No	No	Never Smoked	No	No	Yes	No
1451	2021-07-04	7451	QATAR	Placebo	2	40	Male	88	176	28	6	15.7	17.6	20	98	86	No	No	No	No	No	No	Known T2DM	2021-07-01	2021-07-06	Discharged	Asymptomatic	No	No	No	No	No	No	No	No	No	No	No	No	No	No	No	No	No	Never Smoked	No	No	Yes	Yes
1452	2021-09-12	7452	QATAR	Pioglitazone	3	48	Male	83.5	165	31	10	7.1	8.6	19	98	86	No	No	No	Yes	No	No	Known T2DM	2021-09-05	2021-09-15	Discharged	Symptoms+	No	No	No	No	Mild	No	No	Mild	No	No	Mild	Moderate	No	No	No	No	No	Never Smoked	No	No	Yes	Yes
1456	2021-09-13	7456	QATAR	Pioglitazone	2	64	Male	86.5	162	33	4	5.7	8.5	20	96	82	No	No	No	No	No	No	Known T2DM	2021-09-12	2021-09-15	Discharged	Asymptomatic	No	No	No	No	No	No	No	No	No	No	No	No	No	No	No	No	No	Never Smoked	No	No	Yes	No
1457	2021-11-16	7457	QATAR	Placebo	1	62	Female	78.2	162	30	14	20.5	22.3	20	100	98	Yes	No	No	Yes	No	No	Known T2DM	2021-11-14	2021-11-17	Discharged	Symptoms+	No	No	No	No	Moderate	No	No	No	No	No	No	No	No	No	No	No	No	Never Smoked	No	Yes	Yes	Yes
1460	2021-08-08	7460	QATAR	Placebo	3	31	Male	98	172	33	6	7	10.6	20	97	62	Yes	No	No	No	No	No	Known T2DM	2021-08-05	2021-08-11	Discharged	Symptoms+	Mild	No	Mild	No	Mild	No	No	No	No	No	No	No	No	No	No	No	No	Never Smoked	No	No	Yes	No
1461	2021-06-21	7461	QATAR	Placebo	27	50	Male	76.2	169	27	0	7.7	13.8	22	97	73	No	No	No	Yes	No	No	Known T2DM	2021-06-14	2021-07-18	Discharged	Symptoms+	Mild	No	No	No	Mild	No	No	Mild	No	No	No	No	No	No	No	No	No	Never Smoked	No	No	Yes	Yes
1464	2021-07-14	7464	QATAR	Placebo	27	33	Male	59	145	28	0	6.7	11.6	20	97	69	No	No	No	No	No	No	New Onset Diabetes	2021-07-09	2021-08-10	Discharged	Symptoms+	No	No	No	No	Moderate	No	No	Severe	No	No	No	No	No	No	No	No	No	Never Smoked	No	No	Yes	No
1466	2021-09-22	7466	QATAR	Pioglitazone	26	60	Male	106	162	40	10	8.1	10.1	21	97	21	No	No	No	Yes	No	No	Known T2DM	2021-09-21	2021-10-18	Discharged	Symptoms+	No	No	No	No	Mild	Mild	No	No	No	No	No	No	No	No	No	No	No	Never Smoked	No	No	Yes	Yes
1468	2021-08-29	7468	QATAR	Placebo	2	46	Male	61.7	170	21	0	12.2	28.6	20	100	83	No	No	No	No	No	No	New Onset Diabetes	2021-08-26	2021-08-31	Discharged	Symptoms+	Mild	No	No	No	Mild	No	No	No	No	No	No	No	No	No	No	No	No	Never Smoked	No	No	No	No
1472	2021-07-04	7472	QATAR	Pioglitazone	6	37	Male	71	157	29	0	0	0	19	98	86	No	No	No	No	No	No	Known T2DM	2021-07-03	2021-07-10	Discharged	Symptoms+	No	No	No	No	Moderate	No	No	No	No	No	No	No	No	No	No	Mild	No	Never Smoked	No	No	Yes	No
1480	2021-09-12	7480	QATAR	Placebo	3	34	Male	95	160	37	0	6.2	7.6	20	98	97	No	No	No	No	No	No	New Onset Diabetes	2021-09-11	2021-09-15	Discharged	Symptoms+	Mild	No	No	Mild	Mild	No	Mild	No	No	No	Mild	Moderate	No	Mild	No	No	No	Never Smoked	No	No	No	No
1481	2021-09-21	7481	QATAR	Pioglitazone	2	49	Male	63	169	22	6	11.1	10.4	18	99	65	Yes	No	No	No	No	No	Known T2DM	2021-09-18	2021-09-23	Discharged	Symptoms+	No	No	No	No	Mild	No	Mild	No	No	No	No	No	No	No	No	No	No	Never Smoked	No	No	Yes	No
1482	2021-08-05	7482	QATAR	Placebo	3	54	Male	63.9	158	26	3	6.5		20	96	78	No	No	No	Yes	No	No	Known T2DM	2021-08-04	2021-08-08	Discharged	Symptoms+	Mild	No	No	No	Mild	No	Mild	No	No	No	Mild	Mild	No	No	No	No	No	Never Smoked	No	No	Yes	No
1483	2021-09-21	7483	QATAR	Placebo	2	46	Male	66.8	177	21	4	8.6	13	18	100	64	Yes	No	No	No	No	No	Known T2DM	2021-09-18	2021-09-23	Discharged	Asymptomatic	No	No	No	No	No	No	No	No	No	No	No	No	No	No	No	No	No	Never Smoked	No	No	Yes	Yes
1484	2021-06-23	7484	QATAR	Pioglitazone	13	46	Female	61	145	29	0			21	97	76	No	No	No	No	No	No	Known T2DM	2021-06-23	2021-07-06	Discharged	Symptoms+	No	No	No	No	Mild	No	No	Mild	No	No	No	No	No	No	No	No	No	Never Smoked	No	No	Yes	No
1489	2021-06-01	7489	QATAR	Placebo	2	47	Male	80	179	25	10	9.3	9.9	18	100	72	Yes	No	No	Yes	No	No	Known T2DM	2021-05-29	2021-06-03	EVENT	Symptoms+	Mild	No	No	No	Mild	No	No	Mild	No	No	No	No	No	No	No	No	No	Never Smoked	No	No	Yes	Yes
1492	2021-09-06	7492	QATAR	Placebo	3	51	Female	52	151	23	4	10.4	11.4	20	98	85	No	No	No	No	No	No	Known T2DM	2021-09-05	2021-09-09	Discharged	Symptoms+	No	No	No	No	Mild	No	Mild	No	No	No	No	No	No	No	No	No	No	Never Smoked	No	No	Yes	No
1493	2021-11-18	7493	QATAR	Placebo	4	40	Male	110	174	36	3	6.8	7	21	97	85	No	Yes	No	No	No	No	Known T2DM	2021-11-16	2021-11-22	Discharged	Symptoms+	No	No	No	Moderate	Mild	No	No	Mild	No	No	No	No	No	No	No	No	No	Never Smoked	No	No	Yes	No
1494	2021-08-09	7494	QATAR	Placebo	3	58	Male	87	169	30	8	6.5	8.7	20	96	77	No	No	No	Yes	No	No	Known T2DM	2021-08-08	2021-08-12	Discharged	Symptoms+	Mild	No	No	No	Mild	No	No	No	No	No	No	No	No	No	No	No	No	Never Smoked	No	No	Yes	Yes
1500	2021-06-23	7500	QATAR	Placebo	8	40	Male	98	168	35	0	8.5	6.4	20	98	100	No	No	No	Yes	No	No	Known T2DM	2021-06-16	2021-07-01	Discharged	Symptoms+	No	No	No	No	Mild	No	No	No	No	No	No	No	No	No	No	Mild	No	Never Smoked	No	No	Yes	Yes
1505	2021-06-27	7505	QATAR	Pioglitazone	8	33	Male	68	152	29	3	5.1	19.2	21	99	78	Yes	No	No	No	No	No	Known T2DM	2021-06-25	2021-07-05	Discharged	Symptoms+	No	No	No	No	Mild	No	No	No	No	No	No	No	No	No	No	No	No	Never Smoked	No	No	Yes	No
1508	2021-09-29	7508	QATAR	Pioglitazone	1	58	Male	120	176	39	10	8	14	21	98	100	No	No	No	No	No	No	Known T2DM	2021-09-28	2021-09-30	Discharged	Symptoms+	No	No	No	No	Mild	No	No	No	No	No	No	No	No	No	No	No	No	Never Smoked	No	No	Yes	Yes
1512	2021-09-12	7512	QATAR	Placebo	1	43	Male	94.4	172	32	0	4.5	5.9	20	97	83	No	No	No	No	No	No	New Onset Diabetes	2021-09-09	2021-09-13	Discharged	Symptoms+	No	No	Moderate	No	Moderate	No	No	No	No	No	Moderate	No	No	No	No	No	No	Never Smoked	No	No	No	No
1513	2021-11-24	7513	QATAR	Pioglitazone	1	34	Female	62	161	24	0	8.3	9.8	19	100	72	No	No	No	Yes	No	No	Known T2DM	2021-11-22	2021-11-25	Discharged	Asymptomatic	No	No	No	No	No	No	No	No	No	No	No	No	No	No	No	No	No	Never Smoked	No	No	Yes	Yes
1517	2022-01-16	7517	QATAR	Pioglitazone	2	32	Male	73.2	168	29	0	6.9	8.1	20	98	65	No	No	No	No	No	No	New Onset Diabetes	2022-01-15	2022-01-18	Discharged	Symptoms+	Moderate	No	No	No	Mild	No	Mild	No	No	No	No	No	No	No	No	Mild	No	Never Smoked	No	No	No	No
1522	2022-01-19	7522	QATAR	Pioglitazone	2	32	Male	60	165	22	2	9.9	19.9	20	99	104	Yes	No	No	No	No	No	Known T2DM	2022-01-11	2022-01-21	Discharged	Asymptomatic	No	No	No	No	No	No	No	No	No	No	No	No	No	No	No	No	No	Never Smoked	No	No	Yes	No
1523	2021-07-11	7523	QATAR	Pioglitazone	11	36	Male	63	165	23	0	12.5	11.2	20	97	78	No	No	No	No	No	No	New Onset Diabetes	2021-07-10	2021-07-22	Discharged	Symptoms+	Mild	No	No	No	No	No	No	No	No	No	Mild	No	Mild	No	Moderate	No	No	Never Smoked	No	No	No	No
1525	2021-07-29	7525	QATAR	Placebo	3	36	Male	93.5	178	30	0	11.3	15.6	21	99	76	No	No	No	No	No	No	New Onset Diabetes	2021-07-28	2021-08-01	Discharged	Symptoms+	No	No	No	No	Mild	Mild	No	Mild	No	No	No	No	No	No	No	No	No	Never Smoked	No	No	No	No
1526	2021-06-27	7526	QATAR	Pioglitazone	2	32	Female	50	153	21	0	7.8	9.2	18	99	62	No	No	No	No	No	No	New Onset Diabetes	2021-06-19	2021-06-29	Discharged	Symptoms+	Moderate	No	Moderate	No	No	No	No	No	No	No	No	No	Moderate	No	No	No	No	Never Smoked	No	No	No	No
1528	2021-09-16	7528	QATAR	Placebo	5	42	Female	78	153	33	0	6.1	9	18	98	77	No	No	No	No	No	No	New Onset Diabetes	2021-09-07	2021-09-21	Discharged	Symptoms+	Mild	No	No	No	Mild	No	Mild	No	No	No	Mild	No	No	No	No	No	No	Never Smoked	No	No	No	No
1530	2021-11-24	7530	QATAR	Pioglitazone	14	47	Female	169	149	76	10	21	16	20	96	92	Yes	No	Yes	No	No	No	Known T2DM	2021-11-22	2021-12-08	Discharged	Symptoms+	No	No	Moderate	No	Mild	No	No	Mild	No	No	Moderate	No	No	No	No	No	No	Never Smoked	No	Yes	Yes	No
1535	2021-06-03	7535	QATAR	Placebo	1	51	Female	73	168	26	1	5.5	7.5	20	99	84	No	No	No	Yes	No	No	Known T2DM	2021-06-02	2021-06-04	Discharged	Symptoms+	Moderate	No	No	No	Moderate	No	No	No	No	No	No	No	No	No	No	No	No	Never Smoked	No	No	Yes	Yes
1541	2021-09-08	7541	QATAR	Placebo	8	51	Male	98.3	173	33	0	7	8.4	22	96	97	No	No	No	No	No	No	New Onset Diabetes	2021-09-06	2021-09-16	Discharged	Symptoms+	No	No	No	No	Mild	No	No	No	No	No	No	No	No	No	No	No	No	Never Smoked	No	Yes	No	No
1542	2021-06-03	7542	QATAR	Pioglitazone	2	62	Male	68	168	24	20	11.3	23	20	99	76	Yes	No	No	No	No	No	Known T2DM	2021-05-31	2021-06-05	Discharged	Asymptomatic	No	No	No	No	No	No	No	No	No	No	No	No	No	No	No	No	No	Never Smoked	No	No	Yes	No
1543	2021-06-03	7543	QATAR	Placebo	4	59	Female	71	152	31	13	9.3	7.2	20	98	98	Yes	No	No	Yes	No	No	Known T2DM	2021-06-01	2021-06-07	Discharged	Symptoms+	Mild	No	No	No	Mild	No	No	No	No	No	No	No	No	No	No	No	No	Never Smoked	No	No	Yes	No
1544	2021-06-28	7544	QATAR	Placebo	8	38	Female	67.8	151	30	8	9.6	19.9	20	98	88	No	No	No	Yes	No	No	New Onset Diabetes	2021-06-22	2021-07-06	Discharged	Symptoms+	No	No	No	No	Moderate	No	No	No	No	No	No	No	No	No	No	No	No	Never Smoked	No	No	Yes	No
1545	2021-09-06	7545	QATAR	Pioglitazone	10	62	Male	70.1	177	22	6	6.7	7.4	19	96	69	Yes	No	No	Yes	No	No	New Onset Diabetes	2021-09-06	2021-09-16	Discharged	Symptoms+	No	No	Mild	No	Mild	No	No	No	No	No	No	Mild	No	No	No	No	No	Never Smoked	No	No	No	No
1548	2021-11-26	7548	QATAR	Placebo	2	36	Male	78.6	182	24	1.5	5.3	6.9	19	98	78	No	No	No	No	No	No	Known T2DM	2021-11-25	2021-11-28	Discharged	Symptoms+	No	No	No	Mild	Mild	No	No	No	No	No	No	No	No	Mild	No	Mild	No	Never Smoked	No	No	Yes	No
1549	2022-01-02	7549	QATAR	Pioglitazone	1	57	Male	105	173	35	7	11.9	17.8	19	98	100	Yes	No	No	No	No	No	Known T2DM	2021-12-28	2022-01-03	Discharged	Symptoms+	Mild	No	No	No	Mild	No	No	No	No	No	No	No	No	No	No	No	No	Never Smoked	No	No	Yes	Yes
1554	2021-06-03	7554	QATAR	Placebo	21	29	Female	88	163	33	3	7.3	7.9	23	99	95	No	No	No	Yes	Yes	No	Known T2DM	2021-06-01	2021-06-24	Discharged	Symptoms+	Moderate	No	No	No	Moderate	No	No	Moderate	No	No	No	No	No	No	No	No	No	Never Smoked	No	No	Yes	Yes
1559	2022-01-02	7559	QATAR	Pioglitazone	3	64	Male	83	172	28	15	14	15.2	19	98	70	Yes	No	No	Yes	No	No	Known T2DM	2021-12-28	2022-01-05	Discharged	Symptoms+	No	No	Mild	No	Mild	No	No	No	No	No	No	No	No	No	No	No	No	Never Smoked	No	No	Yes	Yes
1562	2021-09-06	7562	QATAR	Pioglitazone	3	56	Male	87.9	178	28	6	6	7.7	20	98	69	No	No	No	Yes	No	No	Known T2DM	2021-08-27	2021-09-09	Discharged	Symptoms+	No	No	No	No	Mild	No	Mild	No	No	No	No	No	No	No	No	Mild	No	Never Smoked	No	No	Yes	Yes
1563	2021-12-01	7563	QATAR	Pioglitazone	4	47	Male	60	165	22	0	12.7	13	19	98	93	Yes	No	No	No	No	No	Known T2DM	2021-11-28	2021-12-05	Discharged	Asymptomatic	No	No	No	No	No	No	No	No	No	No	No	No	No	No	No	No	No	Never Smoked	No	No	Yes	No
1564	2021-06-28	7564	QATAR	Pioglitazone	8	72	Female	82	154	35	12	8.1	10.1	23	97	82	No	Yes	No	Yes	No	Yes	Known T2DM	2021-06-27	2021-07-06	Discharged	Symptoms+	Moderate	No	No	No	Moderate	No	No	No	No	No	Mild	No	No	No	No	No	No	Never Smoked	No	No	Yes	Yes
1570	2021-07-11	7570	QATAR	Placebo	7	39	Male	70.2	160	27	0	6.5	6.8	21	97	79	No	No	No	No	No	No	New Onset Diabetes	2021-07-06	2021-07-18	Discharged	Symptoms+	No	No	No	No	Moderate	No	No	Mild	No	No	Mild	No	No	No	No	No	No	Never Smoked	No	No	No	No
1571	2021-12-02	7571	QATAR	Placebo	5	56	Male	94	172	32	15	14.1	16.9	27	96	85	Yes	Yes	Yes	Yes	No	No	Known T2DM	2021-11-30	2021-12-07	Discharged	Symptoms+	No	No	Mild	No	Mild	No	No	No	No	No	No	No	No	No	No	No	No	Never Smoked	No	No	Yes	Yes
1573	2021-07-29	7573	QATAR	Placebo	4	30	Female	56	160	22	0	6.8	7.1	21	98	91	No	No	No	No	No	No	New Onset Diabetes	2021-07-25	2021-08-02	Discharged	Symptoms+	Mild	No	No	No	Mild	No	No	Mild	No	No	No	No	No	No	No	No	No	Never Smoked	No	No	No	No
1574	2021-12-02	7574	QATAR	Pioglitazone	2	59	Male	82	172	28	10	17.9	15.8	20	100	91	No	No	No	Yes	No	No	Known T2DM	2021-12-01	2021-12-04	Discharged	Asymptomatic	No	No	No	No	No	No	No	No	No	No	No	No	No	No	No	No	No	Never Smoked	No	No	Yes	Yes
1575	2021-09-21	7575	QATAR	Pioglitazone	4	38	Male	69	162	26	8	9	16.1	18	100	18	Yes	No	No	Yes	No	No	Known T2DM	2021-09-19	2021-09-25	Discharged	Asymptomatic	No	No	No	No	No	No	No	No	No	No	No	No	No	No	No	No	No	Never Smoked	No	No	Yes	No
1577	2021-06-06	7577	QATAR	Placebo	5	48	Male	71	168	25	0	14.5	10	20	99	100	Yes	No	No	Yes	No	No	Known T2DM	2021-06-01	2021-06-11	Discharged	Symptoms+	Moderate	No	No	No	Moderate	No	No	Moderate	No	No	No	No	No	No	No	No	No	Never Smoked	No	No	Yes	Yes
1584	2021-08-08	7584	QATAR	Placebo	7	49	Male	72.45	164	27	0	7	8.4	20	99	94	No	No	No	No	No	No	New Onset Diabetes	2021-08-04	2021-08-15	Discharged	Symptoms+	Mild	No	Mild	No	Mild	No	No	No	No	No	No	Mild	No	No	No	No	No	Never Smoked	No	No	No	No
1585	2021-09-12	7585	QATAR	Pioglitazone	2	38	Male	64.8	164.4	24	0	4.5	8.9	20	97	89	No	No	No	No	No	No	New Onset Diabetes	2021-09-11	2021-09-14	Discharged	Symptoms+	No	No	No	No	Moderate	Mild	No	No	No	No	No	No	No	No	No	Mild	No	Never Smoked	No	No	No	No
1591	2021-09-26	7591	QATAR	Placebo	33	48	Female	52	152	23	0	9.4	13.5	20	98	78	No	No	No	No	No	No	New Onset Diabetes	2021-09-18	2021-10-29	Discharged	Symptoms+	No	No	Mild	No	No	No	No	No	No	No	No	No	No	No	No	No	No	Never Smoked	No	No	No	No
1594	2021-06-29	7594	QATAR	Placebo	9	44	Male	55.9	156	23	3	21.8	19.2	21	99	88	Yes	Yes	No	Yes	No	No	Known T2DM	2021-06-28	2021-07-08	Discharged	Symptoms+	No	No	Moderate	No	Moderate	No	No	Mild	No	No	No	No	No	No	No	No	No	Never Smoked	No	No	Yes	No
1597	2021-12-04	7597	QATAR	Pioglitazone	1	54	Male	79.9	161	31	3	14.1	18.5	20	98	87	Yes	No	No	No	No	No	Known T2DM	2021-12-01	2021-12-05	Discharged	Symptoms+	No	No	Mild	No	Mild	No	No	No	No	No	No	No	No	No	No	No	No	Never Smoked	No	No	Yes	Yes
1601	2021-06-06	7601	QATAR	Pioglitazone	7	44	Female	71	165	26	0			20	97	97	Yes	No	No	No	No	No	Known T2DM	2021-06-04	2021-06-13	Discharged	Symptoms+	Moderate	No	No	No	Moderate	No	No	Moderate	No	No	No	No	No	No	No	No	No	Never Smoked	No	No	Yes	No
1610	2021-06-06	7610	QATAR	Pioglitazone	10	38	Female	71	149	32	0	10.3	13.9	19	97	103	Yes	No	No	No	No	No	Known T2DM	2021-06-04	2021-06-16	Discharged	Symptoms+	No	No	No	No	Moderate	No	Moderate	No	No	No	Moderate	No	No	No	No	No	No	Never Smoked	No	No	Yes	No
1616	2021-08-09	7616	QATAR	Placebo	2	55	Male	71.3	159	28	2	19.2	19.2	21	97	85	No	No	No	No	No	No	Known T2DM	2021-08-07	2021-08-11	Discharged	Symptoms+	No	No	No	No	Mild	No	No	No	No	No	No	No	No	No	No	No	No	Never Smoked	No	No	Yes	No
1617	2021-09-22	7617	QATAR	Placebo	2	52	Male	78.2	170	27	12	8	22.1	20	99	20	Yes	No	No	Yes	No	No	Known T2DM	2021-09-20	2021-09-24	Discharged	Asymptomatic	No	No	No	No	No	No	No	No	No	No	No	No	No	No	No	No	No	Never Smoked	No	No	Yes	Yes
1619	2021-12-26	7619	QATAR	Pioglitazone	3	55	Male	76	161	29	8	5	5.9	19	97	78	No	No	No	Yes	No	Yes	Known T2DM	2021-12-25	2021-12-29	Discharged	Symptoms+	Mild	No	No	No	Mild	No	No	Mild	No	No	No	No	No	No	No	No	No	Never Smoked	No	No	Yes	Yes
1624	2021-08-05	7624	QATAR	Placebo	3	36	Female	54	143	26	1	8.3	11	19	97	89	No	No	No	No	No	No	Known T2DM	2021-08-04	2021-08-08	Discharged	Symptoms+	Mild	No	No	No	Mild	No	Mild	No	No	No	No	No	No	No	Mild	No	No	Never Smoked	No	No	Yes	No
1627	2021-09-13	7627	QATAR	Placebo	7	43	Male	86	166	31	8	10.3	18.3	20	98	102	Yes	No	No	No	No	No	Known T2DM	2021-09-11	2021-09-20	Discharged	Symptoms+	No	No	Mild	No	Mild	No	No	No	No	No	Moderate	No	No	No	No	No	No	Never Smoked	No	No	Yes	No
1631	2021-06-30	7631	QATAR	Placebo	6	50	Male	80	178	25	2	4.3	7.7	20	97	79	No	No	No	No	No	No	Known T2DM	2021-07-30	2021-07-06	Discharged	Symptoms+	No	No	No	No	Mild	No	No	No	No	No	No	No	No	No	No	No	No	Never Smoked	No	No	Yes	No
1633	2021-08-08	7633	QATAR	Placebo	5	42	Male	80	171	27	0	6.5	6.9	20	97	75	No	No	No	No	No	No	New Onset Diabetes	2021-08-07	2021-08-13	Discharged	Symptoms+	Mild	No	No	No	Mild	No	No	Moderate	No	No	No	No	No	No	No	No	No	Never Smoked	No	No	No	No
1638	2021-09-12	7638	QATAR	Placebo	2	46	Male	95	170.5	33	0	12.7	12.9	20	99	89	Yes	No	No	No	No	No	New Onset Diabetes	2021-09-10	2021-09-14	Discharged	Symptoms+	Mild	Mild	No	No	Mild	No	No	No	No	No	No	No	No	No	No	No	No	Never Smoked	No	No	No	No
1646	2021-08-19	7646	QATAR	Pioglitazone	4	40	Female	72.2	158	29	3	8.2	14.4	19	98	85	Yes	No	No	No	No	No	Known T2DM	2021-08-12	2021-08-23	Discharged	Symptoms+	Mild	No	No	No	Mild	No	No	Mild	No	No	Mild	Mild	No	No	No	No	No	Never Smoked	No	No	Yes	No
1647	2021-06-06	7647	QATAR	Placebo	3	64	Male	95	169	33	0	8.9	16.8	21	95	73	Yes	Yes	No	No	No	Yes	Known T2DM	2021-06-04	2021-06-09	Discharged	Symptoms+	No	No	No	No	No	No	No	Moderate	No	No	Moderate	No	No	No	No	No	No	Currently smoker	No	No	Yes	Yes
1652	2021-10-12	7652	QATAR	Placebo	6	48	Female	51.7	152	22	2	13.9	12.1	20	98	88	No	No	No	No	No	No	Known T2DM	2021-10-09	2021-10-18	Discharged	Symptoms+	No	No	No	No	Mild	No	No	No	No	No	No	No	No	No	No	No	No	Never Smoked	No	No	Yes	No
1654	2021-06-06	7654	QATAR	Placebo	9	52	Male	55	168	19	0	20.1	31.9	20	95	95	Yes	No	No	No	No	No	Known T2DM	2021-06-05	2021-06-15	Discharged	Symptoms+	Severe	Moderate	No	No	Moderate	No	No	No	No	No	Moderate	Moderate	No	No	No	No	No	Never Smoked	No	No	Yes	No
1659	2021-09-16	7659	QATAR	Pioglitazone	3	36	Female	64	152	28	0	6.1	7	22	100	98	No	No	No	No	No	No	New Onset Diabetes	2021-09-14	2021-09-19	Discharged	Symptoms+	Mild	No	Mild	No	Mild	No	Mild	No	No	No	No	Mild	No	No	No	No	No	Never Smoked	No	No	No	No
1661	2021-07-01	7661	QATAR	Pioglitazone	4	28	Male	75	178	24	0	10.5	9.5	20	98	85	No	No	No	No	No	No	New Onset Diabetes	2021-06-24	2021-07-05	Discharged	Symptoms+	No	No	No	No	Moderate	No	No	No	No	No	No	No	No	No	No	No	No	Never Smoked	No	No	No	No
1667	2021-09-29	7667	QATAR	Placebo	3	61	Male	78	167	28	4	9.8	12.1	21	98	89	No	No	No	Yes	No	No	Known T2DM	2021-09-28	2021-10-02	Discharged	Asymptomatic	No	No	No	No	No	No	No	No	No	No	No	No	No	No	No	No	No	Never Smoked	No	No	Yes	Yes
1670	2021-09-08	7670	QATAR	Placebo	4	62	Male	71	173	24	0	6.5	7	20	97	72	No	No	No	No	No	No	New Onset Diabetes	2021-09-04	2021-09-12	Discharged	Symptoms+	No	No	No	No	Mild	No	No	No	No	No	No	No	No	No	No	No	No	Never Smoked	No	No	No	No
1672	2021-06-14	7672	QATAR	Pioglitazone	5	37	Male	83	163	31	2	8.3	9.5	20	97	90	No	No	No	Yes	No	No	Known T2DM	2021-06-13	2021-06-19	Discharged	Symptoms+	Moderate	No	No	No	Moderate	No	No	No	No	No	No	No	No	No	No	No	No	Never Smoked	No	No	Yes	Yes
1674	2021-09-12	7674	QATAR	Pioglitazone	5	48	Male	105	168	37	12	21.1	19	20	97	97	No	Yes	No	Yes	Yes	No	Known T2DM	2021-09-11	2021-09-17	Discharged	Symptoms+	No	No	No	No	Mild	No	No	No	No	No	No	Mild	No	No	No	No	No	Never Smoked	No	No	Yes	Yes
1680	2021-08-10	7680	QATAR	Pioglitazone	8	66	Male	94	167	34	0	8	11.6	19	99	69	No	No	No	No	No	No	New Onset Diabetes	2021-08-08	2021-08-18	Discharged	Symptoms+	No	No	No	No	Mild	No	No	No	No	No	No	Mild	No	No	No	No	No	Never Smoked	No	No	No	Yes
1691	2022-01-04	7691	QATAR	Pioglitazone	1	58	Male	60	158	24	0	6.4	6.9	18	99	67	No	No	No	No	No	No	New Onset Diabetes	2021-12-31	2022-01-05	Discharged	Symptoms+	No	No	No	No	Mild	No	No	No	No	No	No	No	No	No	No	No	No	Never Smoked	No	No	No	No
1694	2021-07-29	7694	QATAR	Pioglitazone	3	30	Female	70.4	158	28	0	5.7	6.8	20	99	78	No	No	No	No	No	No	New Onset Diabetes	2021-07-28	2021-08-01	Discharged	Symptoms+	No	No	Mild	No	No	No	No	No	No	No	No	Mild	No	No	No	No	No	Never Smoked	No	No	No	No
1695	2021-09-06	7695	QATAR	Placebo	3	44	Female	61	139	32	0	8.6	10.6	20	98	76	No	No	No	No	No	No	New Onset Diabetes	2021-09-04	2021-09-09	Discharged	Symptoms+	No	No	Mild	No	Mild	No	No	No	No	No	Mild	Mild	No	No	No	No	No	Never Smoked	No	Yes	No	No
1696	2021-08-29	7696	QATAR	Placebo	63	42	Male	84	176	27	0	6.7	6.8	19	98	65	No	No	No	No	No	No	New Onset Diabetes	2021-08-26	2021-10-31	Discharged	Symptoms+	No	No	No	No	Mild	No	No	Mild	No	No	No	No	No	No	No	No	No	Never Smoked	No	No	No	No
1698	2021-07-11	7698	QATAR	Pioglitazone	1	49	Female	69	159	27	6	12.4	15.7	20	98	74	Yes	No	No	No	No	No	Known T2DM	2021-07-07	2021-07-12	Discharged	Asymptomatic	No	No	No	No	No	No	No	No	No	No	No	No	No	No	No	No	No	Never Smoked	No	Yes	Yes	No
1699	2021-08-19	7699	QATAR	Placebo	7	41	Male	128	173	43	20	14.4	7.7	20	96	88	Yes	No	No	No	No	No	Known T2DM	2021-08-17	2021-08-26	Discharged	Symptoms+	Mild	No	No	No	Mild	No	No	No	No	No	Mild	Mild	No	No	No	No	No	Never Smoked	No	No	Yes	No
1721	2021-12-08	7721	QATAR	Pioglitazone	8	59	Male	78	169	27	10	13.3	12	21	96	76	Yes	Yes	Yes	Yes	No	No	Known T2DM	2021-12-04	2021-12-16	Discharged	Symptoms+	Mild	No	No	No	Moderate	No	No	Moderate	No	No	No	No	No	No	No	No	No	Never Smoked	No	No	Yes	Yes
1725	2022-01-13	7725	QATAR	Pioglitazone	2	55	Male	55	165	20	8	6	5.4	21	99	94	No	No	No	Yes	No	No	Known T2DM	2022-01-09	2022-01-15	Discharged	Symptoms+	No	No	No	No	Mild	No	No	No	No	No	No	No	No	No	No	No	No	Never Smoked	No	No	Yes	No
1730	2021-10-14	7730	QATAR	Pioglitazone	2	30	Male	112	169	39	4	11.4	12	22	97	108	Yes	No	No	No	No	No	Known T2DM	2021-10-13	2021-10-16	Discharged	Symptoms+	Mild	No	No	Mild	Mild	No	No	No	No	No	No	No	No	No	No	No	No	Never Smoked	No	No	Yes	No
1738	2021-12-05	7738	QATAR	Pioglitazone	1	38	Female	66	170	23	1	7	10.8	20	97	86	No	No	No	Yes	No	No	New Onset Diabetes	2021-12-03	2021-12-06	Discharged	Asymptomatic	No	No	No	No	No	No	No	No	No	No	No	No	No	No	No	No	No	Never Smoked	No	No	No	No
1809	2021-08-05	7809	KUWAIT	Pioglitazone	2	62	Female	87	162	33	21		6.2	20	96	72	Yes	Yes	No	No	No	No	Known T2DM	2022-07-05	2021-08-07	Discharged	Asymptomatic	No	No	No	No	No	No	No	No	No	No	No	No	No	No	No	No	No	Never Smoked	No	No	Yes	No
1820	2022-01-26	7820	QATAR	Pioglitazone	4	45	Female	53.5	162	20	74	18.4	15.3	19	95	79	Yes	No	No	No	No	No	New Onset Diabetes	2022-01-19	2022-01-30	Discharged	Asymptomatic	No	No	No	No	No	No	No	No	No	No	No	No	No	No	No	No	No	Never Smoked	No	No	No	No
1830	2021-12-05	7830	QATAR	Pioglitazone	6	61	Female	70	153	30	2	7.1	8.1	21	99	92	No	No	No	Yes	Yes	No	Known T2DM	2021-12-03	2021-12-11	Discharged	Symptoms+	No	No	No	No	Mild	No	No	No	No	No	No	No	No	No	No	No	No	Never Smoked	No	No	Yes	No
1882	2022-01-09	7882	QATAR	Placebo	3	46	Male	88	160	34	5	4.8	9.4	20	100	53	No	No	No	No	No	No	Known T2DM	2022-01-05	2022-01-12	Discharged	Symptoms+	No	No	No	No	Mild	No	No	No	No	No	No	No	No	No	No	Moderate	No	Never Smoked	No	No	Yes	Yes
1895	2021-12-14	7895	QATAR	Placebo	4	64	Male	72	169	25	0	5.8	8.1	20	99	89	No	No	No	Yes	No	No	New Onset Diabetes	2021-12-13	2021-12-18	Discharged	Symptoms+	No	No	No	No	Mild	No	No	No	No	No	No	Mild	No	No	No	No	No	Never Smoked	No	No	No	No
1912	2022-02-14	7912	QATAR	Pioglitazone	2	62	Male	76.2	169	27	10	8.5	9.9	21	99	21	No	No	No	Yes	No	No	Known T2DM	2022-02-10	2022-02-16	Discharged	Symptoms+	No	No	No	No	Mild	No	No	No	No	No	No	No	No	No	No	No	No	Never Smoked	No	No	Yes	Yes
1914	2022-02-22	7914	QATAR	Pioglitazone	3	46	Male	63.5	150	28	6	12.6	19.5	20	100	92	No	No	No	No	No	No	Known T2DM	2022-02-18	2022-02-25	Discharged	Symptoms+	No	No	No	No	Moderate	No	Mild	No	No	No	No	No	No	No	No	No	No	Never Smoked	No	No	Yes	No
1938	2021-12-22	7938	QATAR	Pioglitazone	4	62	Male	87	167	31	22	8.9	12.3	20	98	82	Yes	No	No	Yes	No	No	Known T2DM	2021-12-20	2021-12-26	Discharged	Symptoms+	No	No	No	Mild	Mild	No	Mild	No	No	No	No	No	No	No	No	No	No	Never Smoked	No	No	Yes	Yes
1940	2022-01-26	7940	QATAR	Pioglitazone	4	39	Male	57.3	145	27	0	2.7	15.4	20	100	88	Yes	No	No	No	No	No	Known T2DM	2022-01-25	2022-01-30	Discharged	Asymptomatic	No	No	No	No	No	No	No	No	No	No	No	No	No	No	No	No	No	Never Smoked	No	No	Yes	No
1943	2022-02-14	7943	QATAR	Pioglitazone	3	63	Male	77.5	164	29	10	8.9	13.1	19	99	90	No	No	No	No	No	No	Known T2DM	2022-02-11	2022-02-17	Discharged	Asymptomatic	No	No	No	No	No	No	No	No	No	No	No	No	No	No	No	No	No	Never Smoked	No	No	Yes	No
1951	2022-02-09	7951	QATAR	Pioglitazone	7	47	Male	65	170	22	2	6.8	8.6	19	98	87	No	No	No	No	No	No	Known T2DM	2022-02-05	2022-02-16	Discharged	Asymptomatic	No	No	No	No	No	No	No	No	No	No	No	No	No	No	No	No	No	Never Smoked	No	No	Yes	No
1960	2022-01-19	7960	QATAR	Pioglitazone	2	47	Male	85.4	164	32	0	6.7	6.4	19	99	78	No	No	No	Yes	No	No	Known T2DM	2022-01-11	2022-01-21	Discharged	Symptoms+	No	No	No	No	No	Mild	No	No	No	No	No	No	No	No	No	No	No	Never Smoked	No	No	Yes	Yes
1961	2021-12-09	7961	QATAR	Pioglitazone	2	63	Male	83	173	28	0	11.7	14.8	20	99	69	Yes	No	No	Yes	No	Yes	New Onset Diabetes	2021-12-08	2021-12-11	Discharged	Symptoms+	Mild	No	No	No	Mild	No	No	No	No	No	No	No	No	No	No	No	No	Never Smoked	No	No	No	Yes
1975	2022-01-17	7975	QATAR	Pioglitazone	7	44	Male	87	159	34	0	6.5	11.4	29	98	86	No	No	No	Yes	No	Yes	New Onset Diabetes	2022-01-17	2022-01-24	Discharged	Symptoms+	No	No	No	No	No	No	No	Moderate	No	No	No	No	No	No	No	No	No	Currently smoker	No	No	No	Yes
1982	2021-12-30	7982	QATAR	Placebo	4	58	Male	83.5	171	29	15	10.5	11.5	21	99	73	Yes	No	No	No	No	No	Known T2DM	2021-12-28	2022-01-03	Discharged	Symptoms+	Mild	No	No	No	Moderate	No	No	No	No	No	No	No	No	No	No	No	No	Never Smoked	No	No	Yes	No
1985	2022-01-12	7985	QATAR	Pioglitazone	3	58	Male	112	165	41	6	5.3	7.4	19	99	67	No	No	No	Yes	No	No	Known T2DM	2022-01-09	2022-01-15	Discharged	Symptoms+	No	No	No	No	Mild	No	No	No	No	No	No	No	No	No	No	Mild	No	Never Smoked	No	No	Yes	Yes
1986	2021-10-13	7986	QATAR	Placebo	4	54	Male	59	169	21	6	16.2	15.2	24	99	98	Yes	No	No	Yes	No	No	Known T2DM	2021-10-12	2021-10-17	Discharged	Symptoms+	Moderate	No	No	No	Mild	No	No	No	No	No	No	No	No	No	No	No	No	Never Smoked	No	No	Yes	Yes
1990	2022-01-04	7990	QATAR	Pioglitazone	4	68	Male	105	171	36	13	8.9	15.8	19	98	69	Yes	No	No	Yes	No	Yes	Known T2DM	2021-12-31	2022-01-08	Discharged	Asymptomatic	No	No	No	No	No	No	No	No	No	No	No	No	No	No	No	No	No	Never Smoked	No	No	Yes	Yes
1998	2021-12-13	7998	QATAR	Pioglitazone	3	47	Male	88	169	31	8	9.6	8.5	20	97	91	Yes	No	No	Yes	No	No	Known T2DM	2021-12-12	2021-12-16	Discharged	Symptoms+	No	No	No	Mild	Mild	No	No	No	No	No	No	No	No	No	No	No	No	Never Smoked	No	No	Yes	Yes
[truncated: 324 more columns]
